# Supplementary material for: BREVIPEDICELLUS Positively Regulates Salt-Stress Tolerance in Arabidopsis thaliana
Source: MDPI journal article supplement (doi:10.3390/ijms24021054), 2023-01-05
Supplement: s1 [file s1]

**Table S2** List of primers used in this study

| Prime Name                        | Primer sequence (from 5' to 3')                |
|-----------------------------------|------------------------------------------------|
| <i>BP</i> -pBI121-F               | GAATTCATGGAAGAATACCAGCATGACAACAGC              |
| <i>BP</i> -pBI121-R               | GTCGACGACCGAGACGATAAGGTCCATCA                  |
| <i>BP</i> -pPZP211-F              | GGTACCATGGAAGAATACCAGCATGACAACAGC              |
| <i>BP</i> -pPZP211-R              | GTCGACGACCGAGACGATAAGGTCCATCA                  |
| <i>BP</i> -RT-F                   | ATCCTGATGGGAAGAGTGACA                          |
| <i>BP</i> -RT-R                   | TGCAGACCATCCATCACCATG                          |
| <i>BP</i> -pGBKT7-F               | GAATTCATGGAAGAATACCAGCATGACAACAGC              |
| <i>BP</i> -pGBKT7-R               | GGATCCGACCGAGACGATAAGGTCCATCA                  |
| <i>BP</i> -pJG4-5-F               | TTATGCCTCTCCCGAATTCATGGAAGAATACCAGCATGACAACAGC |
| <i>BP</i> -pJG4-5-R               | AGAAGTCCAAAGCTTCTCGAGTTATGGACCGAGACGATAAGGTC   |
| <i>BP</i> -pGEX4T-3-F             | GGATCCATGGAAGAATACCAGCATGACAACAGC              |
| <i>BP</i> -pGEX4T-3-R             | GTCGACTGGACCGAGACGATAAGGTC                     |
| <i>XTH7</i> -pSuper1300-F         | GTCGACATGGTGGTGTCACTCTTCTCTTCC                 |
| <i>XTH7</i> -pSuper1300-R         | GGTACCGATTCCAGCCGAGCATTCTGG                    |
| <i>XTH7</i> -pMDC107-F            | GCAGGTGCACTCTAGAATAGTTCTTACTTCCATGTGGATTTGT    |
| <i>XTH7</i> -pMDC107-R            | CCCCCTCGAGGCGCGCCTCAGATTCCAGCCGAGCATTC         |
| <i>XTH7</i> -pLacZi2 $\mu$ -F     | CAATGTAATGCTGACACGTGTCCCAG                     |
| <i>XTH7</i> -pLacZi2 $\mu$ -R     | TCGACTGGGACACGTGTCAGCATTACATTGGTAC             |
| <i>XTH7</i> -pGreenII0800-F       | TCGACATGTAATGCTGACACGTGTCCCAGTAG               |
| <i>XTH7</i> -pGreenII0800-R       | GATCCTACTGGGACACGTGTCAGCATTACATG               |
| <i>XTH7</i> -Probe-F              | TGTAATGCTGACACGTGTCCCAGT                       |
| <i>XTH7</i> -Probe-R              | ACTGGGACACGTGTCAGCATTACA                       |
| <i>XTH7</i> -mProbe-F             | TGTAATGCAAAAACGTGTCCCAGT                       |
| <i>XTH7</i> -mProbe-R             | ACTGGGACTTTTACGTGCATTACA                       |
| <i>XTH7</i> -qRT-F                | TAGACAATGTGCCCATCAGGGT                         |
| <i>XTH7</i> -qRT-R                | GGTGGAACAGGAAAACGAGATTT                        |
| <i>XTH8</i> -qRT-F                | ATGGAGACGGAAAGGAGGATCA                         |
| <i>XTH8</i> -qRT-R                | AGCCCAAGGGCTAATGGAACAC                         |
| <i>XTH15</i> -qRT-F               | ATGGGTCCAAGTTCGAGCCTC                          |
| <i>XTH15</i> -qRT-R               | GACTCTGGACTTCTTGCAATTCTGGAG                    |
| SALK_201184-F                     | CTCTTATTACATGGCCCATGG                          |
| SALK_201184-R                     | TACATACATTTGCCTGCATGC                          |
| <i>EF-1<math>\alpha</math></i> -F | GTATGGTTGTTACCTTTCTCCACAG                      |
| <i>EF-1<math>\alpha</math></i> -R | CATCATTTGGCACCCCTTCTTCACTGC                    |
| <i>UBQ10</i> -F                   | GCCAAGATCCAGGACAAGG                            |
| <i>UBQ10</i> -R                   | CGCAGGACCAAGTGAAGAG                            |
| <i>GAPDH</i> -F                   | TTGGTGACAACAGGTCAAGCA                          |
| <i>GAPDH</i> -R                   | AAACTTGTCGCTCAATGCAATC                         |
| LBb1.3                            | ATTTTGCCGATTTTCGGAAC                           |
| T23J18-F                          | GATATTTGTTTGTGCTAACAC                          |
| T23J18-R                          | TAATAAAGTTCCAGCTTTGA                           |

---

|          |                        |
|----------|------------------------|
| T22J18-F | CACTGCAACAAAGTGGAAT    |
| T22J18-R | ATCCGTTTCAATATCCACAA   |
| F28H19-F | TGCGGGAGTGTGATAGAATA   |
| F28H19-R | TCCTCGAAAGATTCATTGA    |
| F19K23-F | GAATTCTGTAACATCCCATTTC |
| F19K23-R | GGTCTAATTGCCGTTGTTGC   |
| T17F3-F  | GGACCGACGGTTACGAGAGT   |
| T17F3-R  | TAACGGGGCCGTTGCAAGA    |
| T23K3-F  | CGTGTTTACCGGGTCGGA     |
| T23K3-R  | AAAACCCTTGAAGAATACG    |
| T12H3-F  | TAGTCTGAGCTTACCAATA    |
| T12H3-R  | TTACCCTCGACTCGTAAC     |
| F3P11-F  | ATGTATTTGTTGCAAAATAA   |
| F3P11-R  | TGCACAGAAGAAAAAACTA    |
| T20P8-F  | TCCGATTCGATTAAACTC     |
| T20P8-R  | TTATTTCTATTTCAAGACT    |
| T16B24-F | ATGAACGGAGTAGCTATC     |
| T16B24-R | CGCGTAGAACATAATCTGTA   |
| F20H23-F | CAATGGGAAGAAGGTGTGAG   |
| F20H23-R | CGCATTTCCATAAGTTTGTT   |
| MGL6-F   | ACCTGTTCAGTCTATGTTAC   |
| MGL6-R   | GGGAATTATTAACATTATCA   |
| K1G2-F   | ATGAGCTTTAGGAGTGTGTA   |
| K1G2-R   | AATTTTGTCCCAAAAGAATA   |
| T32N15-F | CAAAAGAAATGCAACGAGAC   |
| T32N15-R | TTTGATCATGAATGGTAGTG   |
| T26I12-F | GAGCAACATTAAGGATAGAA   |
| T26I12-R | ATCTCATACTCATAATATGTAG |
| T4I9-F   | TTATAGCAAACGTACAAGTC   |
| T4I9-R   | CTGCATACACGTCGTCTC     |
| F17A8-F  | CTGGACCCTAGTGGATGT     |
| F17A8-R  | GACGGTTCTCCATTAATTAT   |
| FCA8-F   | TTCGGAGAAAGAAACGACAT   |
| FCA8-R   | ATGGAACATTCAGGCATTA    |
| T15N24-F | GCAACCGCTGCTGCTTTA     |
| T15N24-R | AATATTTGGCTTTGCGTAGA   |
| T4L20-F  | ACCCTAAAACAATGTCTCTT   |
| T4L20-R  | TGCTAACATGGAAATTTGTC   |
| MBK20-F  | CTCTGTTGGGGCAAAACC     |
| MBK20-R  | CTCTGTTGGGGCAAAACC     |
| MYJ24-F  | TTCATGAGAGCGGCATTC     |
| MYJ24-R  | TTCATGAGAGCGGCATTC     |
| T26D22-F | CACAGGCCATTGGATGTA     |
| T26D22-R | TGTTAGAACCCACCATTG     |

---

---

|          |                        |
|----------|------------------------|
| K6M13-F  | CCTGTTCCAATGAATATG     |
| K6M13-R  | TGTAGCTGCTGAGTTGTC     |
| MQB2-F   | AAAAGGCGACTACTAGCA     |
| MQB2-R   | GCCATTTATTTGGTCAAC     |
| F14G16-F | CTCCGATGAATCACCATTAG   |
| F14G16-R | CCGGTTTGGCTTGTCTGTTC   |
| T3E15-F  | GCTTAATACCAACGTTTTCC   |
| T3E15-R  | GCTGAAGAGAGAGTTAGCTC   |
| F1K3-F   | CCGATCGCCAAGAAGTAA     |
| F1K3-R   | GTGCAAACACTATCCAAAAT   |
| F9M13-F  | TTGGAGGAGTCATGAAGTTG   |
| F9M13-R  | TTGTAAGTAAAGTAACCTCTCT |
| T15G18-F | GAAGCCAAATCGTCTGTT     |
| T15G18-R | CGAGGATTAGTAGGCTATA    |
| T3F12-F  | ATCCTTCTCGCTCTCCTGTG   |
| T3F12-R  | TGTTGACGCCTTGCCATA     |
| T15F16-F | TCATTGATGTGTGTGTGGGTG  |
| T15F16-R | TGGGATTGTTGATTTCACCACA |

---
