# Supplementary material for: BREVIPEDICELLUS Positively Regulates Salt-Stress Tolerance in Arabidopsis thaliana
Source: Int J Mol Sci. 2023 Jan 5;24(2):1054. doi: 10.3390/ijms24021054 (PMC9866879; doi:10.3390/ijms24021054)
Supplement: Supplementary file 1 [file ijms-24-01054-s001.zip › Supplementary Table S1.xlsx]

## Sheet: OEvsWT_deg_up
Table S1 Up-regulated genes (log2Fold_Change >0.5) in BP-overexpression line (OeBP_18)
gene_id	OE1	OE2	OE3	WT1	WT2	WT3	OE	WT	log2FoldChange	pvalue	padj	gene_name	gene_chr	gene_start	gene_end	gene_strand	gene_length	gene_biotype	gene_description	tf_family
826841	741.585	614.563	657.113	201.558	134.045	131.015	671.087	155.539	2.1036	6.19943e-25	4.09431e-21	CYP706A6	NC_003075.7	7313779	7316871	-	2941	protein_coding	cytochrome P450%2C family 706%2C subfamily A%2C polypeptide 6	p450
832464	570.535	631.714	664.612	70.4133	192.42	243.163	622.287	168.666	1.88707	2.01259e-08	7.38434e-06	FRO5	NC_003076.8	8105461	8108642	-	2382	protein_coding	ferric reduction oxidase 5	FAD_binding_8
822175	441.42	209.618	434.013	78.3348	122.154	98.5231	361.684	99.6707	1.86189	7.13179e-10	4.55813e-07	TPS-CIN	NC_003074.8	9439146	9442774	+	3125	protein_coding	terpene synthase-like sequence-1%2C8-cineole	-
840280	26.4852	18.1034	28.1218	5.281	7.56707	7.33683	24.2368	6.7283	1.85798	0.00114636	0.046734	F14M2.3	NC_003070.9	12283725	12285371	-	1141	protein_coding	LURP-one-like protein (DUF567)	-
840172	130.219	108.62	109.675	27.2852	25.9442	49.2615	116.171	34.1637	1.76913	1.93791e-08	7.24449e-06	F6N18.16	NC_003070.9	11869752	11872926	-	1741	protein_coding	GroES-like zinc-binding dehydrogenase family protein	ADH_zinc_N
834442	1208.39	1115.74	1078	353.827	342.68	339.59	1134.04	345.366	1.71441	9.60421e-40	1.90288e-35	GLK2	NC_003076.8	17798262	17800926	+	1732	protein_coding	GOLDEN2-like 2	Myb_DNA-binding
6240993	33.1065	30.4899	33.7462	7.9215	12.9721	9.43306	32.4475	10.1089	1.69347	0.000387301	0.0218621	AT2G30766	NC_003071.7	13107583	13110480	+	1995	protein_coding	hypothetical protein	-
834898	623.505	495.462	517.441	91.5373	204.311	216.96	545.469	170.936	1.67768	3.3991e-09	1.64259e-06	MJE7.6	NC_003076.8	19627634	19629167	-	1534	protein_coding	Eukaryotic aspartyl protease family protein	-
841144	46.3491	23.8203	68.4298	16.7232	11.8911	15.7218	46.1997	14.7787	1.64011	0.000847207	0.0373599	T3F24.21	NC_003070.9	17385707	17386485	+	779	protein_coding	hypothetical protein	-
823778	97.1123	100.045	99.3638	12.3223	49.7265	37.7322	98.8404	33.2603	1.58504	0.000121974	0.0094034	MEE39	NC_003074.8	17020718	17025069	-	2991	protein_coding	Leucine-rich repeat protein kinase family protein	Pkinase_Tyr
842553	113.666	144.827	163.107	23.7645	50.8075	67.0796	140.533	47.2172	1.58409	7.09703e-06	0.00105724	FMO_GS-OX3	NC_003070.9	23159734	23162881	+	2284	protein_coding	flavin-monooxygenase glucosinolate S-oxygenase 3	FMO-like
3766721	75.0414	44.7821	140.609	24.6447	36.7543	28.2992	86.8108	29.8994	1.54316	0.000398042	0.0221528	AT1G13609	NC_003070.9	4662698	4663253	+	501	protein_coding	Defensin-like (DEFL) family protein	-
819292	58.4881	65.7439	63.7428	12.3223	22.7012	30.3954	62.6583	21.8063	1.53748	7.12989e-05	0.00695884	PRR9	NC_003071.7	19232607	19235179	+	2140	protein_coding	pseudo-response regulator 9	CCT
831887	116.976	78.1305	94.6768	29.0455	34.5923	36.6841	96.5945	33.4407	1.53204	4.84338e-07	0.000111584	LAC11	NC_003076.8	777021	779424	-	1937	protein_coding	laccase 11	-
823904	247.195	307.758	283.093	109.141	87.5618	96.4269	279.349	97.7098	1.51309	3.66121e-14	7.25396e-11	CDF3	NC_003074.8	17503883	17506124	-	1900	protein_coding	cycling DOF factor 3	zf-Dof
844415	54.0739	59.0743	43.1201	14.9628	24.8632	16.7699	52.0894	18.8653	1.47373	0.000154476	0.011255	NIP6%3B1	NC_003070.9	30350539	30352208	-	1212	protein_coding	NOD26-like intrinsic protein 6%3B1	-
833473	146.772	96.2339	139.672	22.8843	46.4834	69.1758	127.559	46.1812	1.47332	8.37512e-05	0.0074746	EXT13	NC_003076.8	13434151	13435424	+	1274	protein_coding	proline-rich extensin-like family protein	-
837117	438.109	852.766	309.34	135.546	244.308	200.191	533.405	193.348	1.46597	1.73749e-05	0.00226479	ADS1	NC_003070.9	1843463	1846311	+	1449	protein_coding	delta 9 desaturase 1	-
829936	5886.33	6986.96	6543.95	2331.7	2548.76	2330.21	6472.41	2403.56	1.42913	0.000989061	0.0438941	XTH7	NC_003075.7	17775370	17777445	-	1288	protein_coding	xyloglucan endotransglucosylase/hydrolase 7	-	2403.56
838211	186.5	277.268	296.216	47.529	123.235	114.245	253.328	95.003	1.42173	2.12152e-05	0.00264234	CYP79F1	NC_003070.9	5608682	5612064	+	3272	protein_coding	cytochrome p450 79f1	p450
834383	722.825	727.947	714.294	274.612	294.035	255.741	721.689	274.796	1.39327	7.73474e-24	3.83121e-20	TZP	NC_003076.8	17526660	17530605	+	3495	protein_coding	zinc knuckle (CCHC-type) family protein	-
827252	68.4201	76.2249	70.3045	15.843	33.5113	33.5398	71.6498	27.6314	1.38878	0.000109656	0.00883179	DL3910C	NC_003075.7	8964683	8966351	-	1669	protein_coding	Calcium-dependent lipid-binding (CaLB domain) family protein	C2
838463	102.63	122.913	126.548	33.4463	41.0784	61.839	117.364	45.4546	1.37636	3.49522e-06	0.00057709	F6A14.9	NC_003070.9	6485515	6487153	-	1639	protein_coding	phytochrome kinase substrate-like protein	-
827396	691.925	467.83	555.875	285.174	171.881	202.287	571.877	219.78	1.37576	2.47579e-09	1.39385e-06	DL4470C	NC_003075.7	9495983	9497313	-	1193	protein_coding	Leucine-rich repeat (LRR) family protein	LRR_3
836538	779.106	779.399	694.609	226.203	301.602	344.831	751.038	290.878	1.37083	7.97513e-14	1.21547e-10	LNK1	NC_003076.8	25672466	25676823	-	2667	protein_coding	dentin sialophosphoprotein-like protein	-
840976	124.701	80.0361	166.856	34.3265	67.0226	44.021	123.864	48.4567	1.36054	0.000132525	0.00998376	TED6	NC_003070.9	16575759	16576541	+	783	protein_coding	tracheary element differentiation-related 6	-
842758	165.532	121.96	134.047	70.4133	48.6455	45.0691	140.513	54.7093	1.35119	8.11646e-07	0.000176716	F1N19.7	NC_003070.9	23953099	23954610	+	1512	protein_coding	Glutaredoxin family protein	-
823570	104.837	94.3283	83.4281	45.7687	24.8632	40.8766	94.1978	37.1695	1.33175	1.88626e-05	0.00242679	F14L2.1	NC_003074.8	16073765	16074929	-	1165	protein_coding	hypothetical protein	-
838469	222.917	159.119	249.347	41.3678	110.263	100.619	210.461	84.0834	1.32982	9.71777e-05	0.00808984	NRT1.9	NC_003070.9	6520721	6523368	+	1970	protein_coding	Major facilitator superfamily protein	-
824624	475.63	320.144	417.14	95.9382	198.906	192.854	404.305	162.566	1.31777	2.38357e-06	0.000417926	HRGP1	NC_003074.8	20206128	20208783	+	2656	protein_coding	hydroxyproline-rich glycoprotein	-
819242	1386.06	1607.39	1517.64	477.931	687.522	666.603	1503.7	610.685	1.30169	2.71053e-14	5.96708e-11	SPA1	NC_003071.7	19022154	19027528	-	4128	protein_coding	SPA (suppressor of phyA-105) protein family	Pkinase
6241476	76.1449	68.6024	61.868	18.4835	35.6733	31.4435	68.8718	28.5335	1.28165	0.000233531	0.0154167	AT5G26146	NC_003076.8	9135913	9139579	+	3667	lncRNA	other RNA	-
827599	56.281	60.9799	51.5567	29.9257	18.3772	20.9624	56.2725	23.0884	1.27391	0.000396646	0.0221373	F28A21.60	NC_003075.7	10263969	10265439	-	790	protein_coding	transcription factor-like protein	-
831868	423.763	428.765	383.394	138.186	180.529	202.287	411.974	173.667	1.2496	4.5604e-11	3.92849e-08	T20L15.60	NC_003076.8	304677	305912	-	1236	protein_coding	hypothetical protein	-
827195	112.562	81.9417	117.174	28.1653	47.5644	56.5984	103.893	44.1094	1.2438	0.000131013	0.00990749	ATCSLB05	NC_003075.7	8721482	8726733	-	2619	protein_coding	Cellulose synthase family protein	-
834372	236.16	194.373	183.729	52.81	76.7517	131.015	204.754	86.8588	1.24104	6.99975e-05	0.00690862	K9D7.1	NC_003076.8	17485231	17486309	-	1079	protein_coding	Cysteine/Histidine-rich C1 domain family protein	-
818785	57.3846	68.6024	83.4281	24.6447	29.1873	35.636	69.805	29.8227	1.23512	0.000207233	0.0141583	PGAZAT	NC_003071.7	17461655	17464242	-	1748	protein_coding	polygalacturonase ADPG2-like protein	-
817969	109.251	118.149	116.237	46.6488	58.3745	41.9247	114.546	48.9827	1.22889	1.89578e-06	0.000354349	T14G11.20	NC_003071.7	14393181	14394858	-	1369	protein_coding	Cysteine proteinases superfamily protein	Peptidase_C1
838583	96.0088	96.2339	60.9306	29.0455	44.3214	35.636	84.3911	36.3343	1.22014	0.000216362	0.0146307	GH9B5	NC_003070.9	6918159	6921979	-	2305	protein_coding	glycosyl hydrolase 9B5	-
829032	494.39	524.999	556.812	162.831	261.604	262.03	525.4	228.822	1.20299	7.0554e-09	2.85283e-06	F19B15.140	NC_003075.7	14348637	14349720	+	1084	protein_coding	cotton fiber protein	-
839454	45.2455	50.499	45.9323	20.2438	23.7822	17.818	47.2256	20.6147	1.19826	0.0011238	0.0461946	T1G11.8	NC_003070.9	1300368	1301773	-	1406	protein_coding	glycine-rich protein	-
834622	717.307	789.88	763.039	426.881	244.308	320.724	756.742	330.638	1.19205	6.70796e-09	2.76885e-06	CIPK20	NC_003076.8	18586870	18588792	-	1923	protein_coding	CBL-interacting protein kinase 20	Pkinase
818046	131.322	179.128	152.795	44.8885	86.4808	73.3683	154.415	68.2459	1.18684	3.21112e-05	0.00376462	F19I3.4	NC_003071.7	14685170	14687216	+	2047	protein_coding	FAD-binding Berberine family protein	FAD_binding_4
822232	971.123	1001.4	999.262	355.587	481.049	472.701	990.596	436.446	1.18463	7.05453e-14	1.16476e-10	CYP71B26	NC_003074.8	9632608	9634822	-	2048	protein_coding	cytochrome P450%2C family 71%2C subfamily B%2C polypeptide 26	p450
834353	1826.37	1519.73	1647	352.947	837.783	1008.29	1664.37	733.006	1.18395	7.26864e-05	0.00702505	PHT1%3B1	NC_003076.8	17399769	17402158	-	2012	protein_coding	phosphate transporter 1%3B1	Sugar_tr
842897	92.6981	98.1395	89.9898	30.8058	38.9164	54.5021	93.6092	41.4081	1.18373	7.62761e-05	0.0072309	FMO_GS-OX1	NC_003070.9	24498954	24502776	-	1734	protein_coding	flavin-monooxygenase glucosinolate S-oxygenase 1	FMO-like
835091	137.944	132.441	119.986	44.0083	76.7517	53.454	130.124	58.0714	1.17062	1.73029e-05	0.00226479	CEP1	NC_003076.8	20455317	20457068	+	1580	protein_coding	Cysteine proteinases superfamily protein	Peptidase_C1
826842	230.642	168.648	172.48	58.9712	82.1568	114.245	190.59	85.1243	1.16616	2.89389e-05	0.00345401	CYP706A7	NC_003075.7	7317508	7319774	-	1941	protein_coding	cytochrome P450%2C family 706%2C subfamily A%2C polypeptide 7	p450
820767	400.588	327.767	393.705	164.591	156.746	179.228	374.02	166.855	1.16395	2.65225e-11	2.50234e-08	SPA3	NC_003074.8	5169095	5173105	-	3544	protein_coding	SPA1-related 3	WD40
832479	108.148	117.196	81.5533	25.5248	55.1315	57.6465	102.299	46.1009	1.15866	0.000809164	0.0367705	SQP2	NC_003076.8	8164319	8167776	-	1886	protein_coding	squalene monooxygenase 2	DAO
838554	484.458	1012.84	502.443	296.616	318.898	280.896	666.58	298.803	1.15819	2.13382e-05	0.00264234	CLH1	NC_003070.9	6803486	6805092	-	1454	protein_coding	chlorophyllase 1	-
837756	141.254	121.007	110.612	35.2067	57.2935	75.4645	124.291	55.9882	1.15679	0.000166793	0.0118873	LRX1	NC_003070.9	4069992	4072681	+	2690	protein_coding	leucine-rich repeat/extensin 1	-
837327	192.018	113.384	190.291	49.2893	82.1568	94.3306	165.231	75.2589	1.13894	0.000269609	0.016958	NRT2:1	NC_003070.9	2524023	2526322	+	2111	protein_coding	nitrate transporter 2:1	MFS_1
843891	66.213	67.6496	63.7428	19.3637	34.5923	36.6841	65.8684	30.2134	1.13557	0.00098906	0.041783	F10A5.23	NC_003070.9	28368447	28370061	-	1178	protein_coding	glycine-rich protein	-
834195	164.429	122.913	103.113	32.5662	79.9947	66.0314	130.152	59.5308	1.13447	0.00102355	0.0427702	K16L22.19	NC_003076.8	16768935	16771899	+	1845	protein_coding	alpha/beta-Hydrolases superfamily protein	Abhydrolase_1
825442	252.713	169.6	206.227	64.2522	118.911	106.908	209.513	96.6904	1.11984	4.70643e-05	0.00512355	PRP3	NC_003074.8	23182722	23184042	+	1221	protein_coding	proline-rich protein 3	-
827655	466.801	508.801	420.89	254.368	175.124	215.912	465.497	215.135	1.11037	3.62929e-09	1.67226e-06	NCED4	NC_003075.7	10481619	10483879	+	2261	protein_coding	nine-cis-epoxycarotenoid dioxygenase 4	RPE65
837865	640.059	590.743	507.13	137.306	341.599	331.205	579.31	270.037	1.10352	0.000178639	0.0124626	CYP71B2	NC_003070.9	4459002	4460996	+	1908	protein_coding	cytochrome P450%2C family 71%2C subfamily B%2C polypeptide 2	p450
817460	76.1449	82.8945	62.8054	34.3265	31.3493	37.7322	73.9483	34.4693	1.10006	0.00030174	0.0182825	GLR2.7	NC_003071.7	12511246	12515947	-	3146	protein_coding	glutamate receptor 2.7	Lig_chan
834943	89.3875	94.3283	97.489	30.8058	51.8885	50.3097	93.7349	44.3347	1.09006	0.000219047	0.0147618	ATSDI1	NC_003076.8	19805437	19807853	-	1214	protein_coding	Tetratricopeptide repeat (TPR)-like superfamily protein	-
837813	116.976	85.753	110.612	40.4877	52.9695	54.5021	104.447	49.3198	1.08631	9.13389e-05	0.00783418	EXPA7	NC_003070.9	4276505	4277969	+	1117	protein_coding	expansin A7	-
837698	1495.31	1493.05	1602.01	767.505	690.931	707.375	1530.12	721.937	1.0837	0.00154012	0.0156779	XTH8	NC_003070.9	3878495	3880391	-	1217	protein_coding	xyloglucan endotransglucosylase/hydrolase 8	-	1530.12	1530.12
822336	220.71	211.524	269.032	60.7315	115.668	157.218	233.755	111.206	1.07687	0.000496276	0.0259438	CLC-B	NC_003074.8	10023931	10027198	+	2836	protein_coding	chloride channel B	Voltage_CLC
824869	1599.04	1151.95	1154.87	396.955	741.573	721.105	1301.95	619.878	1.07151	1.10231e-05	0.00152727	AT3G57020	NC_003074.8	21098315	21100519	-	1529	protein_coding	Calcium-dependent phosphotriesterase superfamily protein	Str_synth
819045	553.982	461.16	499.631	142.587	260.523	319.676	504.924	240.929	1.06998	4.83632e-05	0.00520353	F4I1.19	NC_003071.7	18323366	18324561	-	1196	protein_coding	Cysteine/Histidine-rich C1 domain family protein	-
819296	115.873	99.0923	71.2419	55.4505	35.6733	45.0691	95.4023	45.3976	1.06237	0.000663052	0.0320416	CCA1	NC_003071.7	19245591	19248915	+	2722	protein_coding	circadian clock associated 1	-
816812	119.183	189.609	149.046	85.3762	58.3745	75.4645	152.613	73.0717	1.06044	7.97772e-05	0.00735358	ACS4	NC_003071.7	9717602	9719594	-	1736	protein_coding	1-aminocyclopropane-1-carboxylate synthase 4	Aminotran_1_2
834037	708.479	613.61	795.847	209.48	341.599	467.461	705.979	339.513	1.05804	4.70295e-05	0.00512355	SIP1	NC_003076.8	16161449	16165453	+	2991	protein_coding	Raffinose synthase family protein	-
814999	273.68	317.286	288.717	68.653	184.853	170.843	293.228	141.45	1.05649	0.000786239	0.0360755	T1O3.2	NC_003071.7	1594588	1596372	+	1455	protein_coding	GDSL-like Lipase/Acylhydrolase superfamily protein	Lipase_GDSL
820710	244.988	257.259	273.719	103.86	136.207	136.255	258.655	125.441	1.04886	7.99676e-08	2.43753e-05	MSL5	NC_003074.8	4970944	4974534	-	3243	protein_coding	mechanosensitive channel of small conductance-like 5	-
822485	2159.65	1473.05	1883.22	545.703	819.406	1303.86	1838.64	889.656	1.04781	0.0001392	0.0104468	AT3G28550	NC_003074.8	10700562	10704018	-	3457	protein_coding	Proline-rich extensin-like family protein	-
819556	584.881	509.754	436.826	145.228	314.574	284.04	510.487	247.947	1.04429	9.87419e-05	0.00816423	T11I18.12	NC_003074.8	1036194	1039603	-	2501	protein_coding	O-Glycosyl hydrolases family 17 protein	Glyco_hydro_17
831381	150.083	108.62	113.425	37.8472	60.5366	83.8494	124.043	60.7444	1.03476	0.00118743	0.04821	CASP5	NC_003076.8	4967011	4968092	+	893	protein_coding	Uncharacterized protein family (UPF0497)	-
824774	258.231	211.524	179.98	81.8555	142.693	93.2825	216.578	105.944	1.03446	8.32015e-05	0.0074746	AT3G56080	NC_003074.8	20810309	20813110	-	2257	protein_coding	S-adenosyl-L-methionine-dependent methyltransferases superfamily protein	-
834635	1016.37	773.682	915.834	337.104	492.941	494.712	901.962	441.585	1.03172	1.00946e-07	3.03037e-05	K15I22.15	NC_003076.8	18634041	18636720	+	1396	protein_coding	GDSL-like Lipase/Acylhydrolase superfamily protein	Lipase_GDSL
840102	358.654	322.05	319.651	90.6572	202.149	198.094	333.452	163.633	1.03092	0.000230213	0.0153061	PRR1	NC_003070.9	11546160	11548016	-	1329	protein_coding	pinoresinol reductase 1	NmrA
839418	713.996	886.114	853.966	324.782	401.055	482.134	818.025	402.657	1.02464	2.67446e-08	9.29632e-06	F13M7.24	NC_003070.9	1336274	1337849	-	1284	protein_coding	Tetratricopeptide repeat (TPR)-like superfamily protein	-
825348	114.769	136.252	159.357	79.215	70.2657	53.454	136.793	67.6449	1.01422	9.43362e-05	0.00797476	F21F14.14	NC_003074.8	22857577	22859669	-	2009	protein_coding	Cytochrome b561/ferric reductase transmembrane with DOMON related domain-containing protein	Cytochrom_B561
819609	125.805	121.96	134.047	36.967	75.6707	77.5607	127.271	63.3995	1.0139	0.000847861	0.0373599	PPCK2	NC_003074.8	1221422	1222744	+	1249	protein_coding	phosphoenolpyruvate carboxylase kinase 2	Pkinase
831862	643.369	657.439	574.622	370.55	244.308	313.387	625.144	309.415	1.01199	4.06348e-08	1.34183e-05	T7H20.230	NC_003076.8	430858	433821	+	2106	protein_coding	Transmembrane amino acid transporter family protein	Aa_trans
832477	258.231	275.362	206.227	119.703	127.559	120.534	246.607	122.598	1.00825	4.28535e-07	9.98889e-05	SIGE	NC_003076.8	8157151	8160343	-	2635	protein_coding	sigma factor E	Sigma70_r2
824440	92.6981	69.5552	108.738	39.6075	52.9695	42.9728	90.3303	45.1833	1.00339	0.000850417	0.0373599	AT3G52740	NC_003074.8	19546227	19547171	-	945	protein_coding	hypothetical protein	-
843694	1210.59	1555.94	1632.94	629.319	675.631	902.43	1466.49	735.793	0.995919	1.03799e-07	3.0695e-05	F6D5.1	NC_003070.9	27669152	27673572	+	1971	protein_coding	S-adenosyl-L-methionine-dependent methyltransferases superfamily protein	Methyltransf_11
841066	236.16	285.843	254.971	95.9382	164.314	134.159	258.991	131.47	0.983727	2.14918e-05	0.00264483	F27F5.9	NC_003070.9	17013385	17015520	-	2038	protein_coding	TRAM%2C LAG1 and CLN8 (TLC) lipid-sensing domain containing protein	LAG1
843443	1850.65	2567.83	2307.86	1156.54	1188.03	1063.84	2242.11	1136.14	0.981022	2.3342e-10	1.71287e-07	MYBL2	NC_003070.9	26795052	26796532	-	1395	protein_coding	MYB-like 2	Myb_DNA-binding
817696	123.598	106.715	120.924	73.934	61.6176	42.9728	117.079	59.5081	0.970049	0.000380569	0.0215435	STH	NC_003071.7	13381767	13383470	+	1268	protein_coding	salt tolerance homologue	zf-B_box
824623	1338.61	1069.05	1277.67	482.331	655.092	746.26	1228.44	627.894	0.969235	2.59245e-07	6.84857e-05	AT3G54580	NC_003074.8	20200573	20203919	-	3347	protein_coding	Proline-rich extensin-like family protein	-
831734	1317.64	1308.21	1546.7	529.86	790.218	813.34	1390.85	711.139	0.969119	2.49521e-07	6.77226e-05	ATCSLA09	NC_003076.8	985622	990630	-	2433	protein_coding	Nucleotide-diphospho-sugar transferases superfamily protein	-
841230	219.606	183.892	227.787	79.215	121.073	123.678	210.429	107.989	0.967361	4.02836e-05	0.00455865	F21D18.16	NC_003070.9	17773627	17780106	-	4558	protein_coding	serine/threonine-protein phosphatase 7 long form-like protein	Metallophos
834735	668.751	482.122	494.007	155.79	284.306	405.622	548.293	281.906	0.961251	0.00125176	0.0494048	MQD22.3	NC_003076.8	19039701	19040456	-	756	protein_coding	Bifunctional inhibitor/lipid-transfer protein/seed storage 2S albumin superfamily protein	-
827446	8895.71	7115.59	5639.36	1885.32	4306.74	4950.26	7216.89	3714.11	0.958499	0.0012504	0.0494048	TIP2%3B2	NC_003075.7	9698940	9700472	+	1353	protein_coding	tonoplast intrinsic protein 2%3B2	-
826365	89.3875	70.508	85.3028	37.8472	39.9974	49.2615	81.7328	42.3687	0.949364	0.00100247	0.0421698	ATXYN3	NC_003075.7	5159033	5162867	-	2621	protein_coding	glycosyl hydrolase family 10 protein / carbohydrate-binding domain-containing protein	-
842206	171.05	120.054	205.289	80.9753	81.0758	95.3787	165.465	85.8099	0.948079	0.000266471	0.0168703	RXF12	NC_003070.9	21684263	21688359	+	3262	protein_coding	glycosyl hydrolase family 10 protein / carbohydrate-binding domain-containing protein	-
827051	712.893	1464.47	651.489	330.063	633.472	512.53	942.951	492.021	0.938461	0.00283638	0.00827394	XTH15	NC_003075.7	8137020	8138392	-	1207	protein_coding	xyloglucan endotransglucosylase/hydrolase 15	-
838165	396.174	326.814	303.716	117.062	196.744	227.442	342.235	180.416	0.926389	0.000245728	0.0160512	CCR1	NC_003070.9	5478603	5482180	+	1957	protein_coding	cinnamoyl coa reductase 1	Epimerase
835535	201.95	184.845	144.359	86.2563	94.0479	99.5712	177.051	93.2918	0.924173	3.91893e-05	0.00448819	BBX29	NC_003076.8	22114304	22115539	-	1152	protein_coding	B-box type zinc finger family protein	-
824868	342.1	227.722	223.1	132.025	145.936	140.448	264.307	139.47	0.920787	4.39849e-05	0.00484152	AT3G57010	NC_003074.8	21095600	21097481	-	1550	protein_coding	Calcium-dependent phosphotriesterase superfamily protein	Str_synth
836464	812.212	538.338	477.134	244.686	312.412	411.91	609.228	323.003	0.915776	0.000272435	0.0170815	CYP94B1	NC_003076.8	25408821	25410725	-	1905	protein_coding	cytochrome P450%2C family 94%2C subfamily B%2C polypeptide 1	p450
831595	112.562	102.904	86.2402	61.6117	45.4024	52.4059	100.569	53.14	0.913241	0.000709874	0.0336477	RVE1	NC_003076.8	5690225	5692992	-	2017	protein_coding	Homeodomain-like superfamily protein	Myb_DNA-binding
821047	208.571	302.994	220.288	92.4175	170.8	127.87	243.951	130.362	0.909062	0.000616751	0.0302467	PAP17	NC_003074.8	6089381	6091231	+	1658	protein_coding	purple acid phosphatase 17	Metallophos
832758	236.16	211.524	254.034	88.8968	115.668	171.891	233.906	125.485	0.902064	0.000446456	0.0241684	ATK4	NC_003076.8	9497939	9503173	+	3346	protein_coding	kinesin 4	CH
821851	289.13	296.324	343.086	120.583	166.476	211.72	309.513	166.259	0.900528	8.26434e-05	0.0074746	AT3G22800	NC_003074.8	8062712	8064649	-	1938	protein_coding	Leucine-rich repeat (LRR) family protein	-
840915	385.139	379.219	299.966	114.422	209.716	247.356	354.774	190.498	0.900059	0.000863564	0.0378535	RAP2.6	NC_003070.9	16263805	16264945	+	1045	protein_coding	related to AP2 6	AP2
3768908	1919.07	1872.27	2176.63	903.051	993.448	1335.3	1989.32	1077.27	0.885484	3.21525e-07	7.76874e-05	AT3G23450	NC_003074.8	8410048	8412213	+	2166	protein_coding	transmembrane protein	-
835085	970.02	817.512	948.643	322.141	568.611	592.187	912.058	494.313	0.885229	9.267e-05	0.00788014	WR3	NC_003076.8	20436180	20437815	+	1315	protein_coding	nitrate transmembrane transporter	-
826840	1031.82	984.254	1000.2	430.402	578.34	632.015	1005.42	546.919	0.879891	2.04608e-07	5.6304e-05	CYP706A5	NC_003075.7	7309898	7312684	-	2425	protein_coding	cytochrome P450%2C family 706%2C subfamily A%2C polypeptide 5	p450
827332	2310.83	1997.09	2510.34	984.026	1346.94	1377.23	2272.75	1236.06	0.879363	2.67084e-07	6.96282e-05	OPT3	NC_003075.7	9247302	9250343	-	2698	protein_coding	oligopeptide transporter	OPT
842041	120.287	131.488	87.1776	59.8513	65.9416	58.6946	112.984	61.4959	0.877351	0.000971369	0.0412114	ZIP11	NC_003070.9	20905914	20907414	+	1417	protein_coding	zinc transporter 11 precursor	-
841607	2980.69	3219.55	2814.06	1264.8	1889.61	1759.79	3004.76	1638.07	0.875863	2.89404e-07	7.38473e-05	F19C24.2	NC_003070.9	19220236	19225797	-	3813	protein_coding	Leucine-rich repeat protein kinase family protein	Pkinase
818183	1270.19	1151	977.702	345.906	688.603	823.821	1132.96	619.443	0.872029	0.00127145	0.0498836	CASP1	NC_003071.7	15159591	15160799	-	904	protein_coding	Uncharacterized protein family (UPF0497)	-
833659	828.766	747.956	400.267	363.509	365.381	352.168	658.996	360.353	0.870086	0.000469315	0.0249595	THI2.2	NC_003076.8	14561743	14562863	-	905	protein_coding	thionin 2.2	-
835656	866.286	992.829	797.722	338.864	570.773	547.118	885.612	485.585	0.868699	4.04948e-05	0.00455865	MDF20.6	NC_003076.8	22530007	22530987	+	981	protein_coding	hypothetical protein	-
818687	233.952	174.364	254.034	136.426	96.2099	129.967	220.784	120.867	0.866104	0.000221842	0.0147992	UMAMIT11	NC_003071.7	17063098	17065813	-	1782	protein_coding	nodulin MtN21 /EamA-like transporter family protein	DUF6
830088	3050.21	3268.14	3515.23	1496.28	1964.2	1936.92	3277.86	1799.13	0.866083	5.44863e-09	2.29689e-06	CAD9	NC_003075.7	18291218	18293018	+	1379	protein_coding	cinnamyl alcohol dehydrogenase 9	ADH_zinc_N
817037	118.08	109.573	124.673	61.6117	62.6986	69.1758	117.442	64.4953	0.865877	0.000234211	0.0154167	EXT6	NC_003071.7	10622396	10624309	+	1914	protein_coding	Proline-rich extensin-like family protein	-
817601	2923.3	2996.59	3149.64	1746.25	1522.06	1714.72	3023.18	1661.01	0.863766	1.55082e-13	2.19474e-10	RPT2	NC_003071.7	13002686	13005746	-	2465	protein_coding	Phototropic-responsive NPH3 family protein	-
842927	365.275	322.05	314.964	175.153	166.476	210.672	334.096	184.1	0.859354	1.4043e-06	0.000281045	F15E12.2	NC_003070.9	24614817	24616960	+	1536	protein_coding	NAD(P)-binding Rossmann-fold superfamily protein	GFO_IDH_MocA
824807	886.15	1110.98	969.265	381.992	655.092	601.62	988.798	546.235	0.857937	4.89289e-05	0.00521198	WRKY70	NC_003074.8	20908711	20910623	-	1470	protein_coding	WRKY DNA-binding protein 70	WRKY
822158	122.494	120.054	146.233	64.2522	76.7517	74.4164	129.594	71.8068	0.856014	0.000267329	0.0168703	T5M7.5	NC_003074.8	9358719	9360582	+	1864	protein_coding	Eukaryotic aspartyl protease family protein	-
828652	125.805	150.544	113.425	66.8927	69.1846	80.7051	129.924	72.2608	0.848335	0.000441586	0.0240361	DREB1A	NC_003075.7	13018010	13019400	-	1391	protein_coding	dehydration response element B1A	AP2
827018	1277.91	1390.15	1365.78	567.708	790.218	884.612	1344.61	747.513	0.848313	2.14724e-06	0.000390305	CER26	NC_003075.7	8013575	8016582	-	2056	protein_coding	HXXXD-type acyl-transferase family protein	-
839233	163.325	116.243	172.48	84.496	79.9947	86.9938	150.683	83.8282	0.844816	0.000471149	0.0249595	CYP78A8	NC_003070.9	82984	84946	-	1751	protein_coding	cytochrome P450%2C family 78%2C subfamily A%2C polypeptide 8	p450
831709	665.44	504.99	637.428	243.806	368.624	396.189	602.619	336.206	0.843645	8.13415e-05	0.00742682	ABCI20	NC_003076.8	467038	469272	-	1527	protein_coding	non-intrinsic ABC protein 9	ABC_tran
834771	1905.83	1801.77	1659.19	1010.43	925.345	1061.74	1788.93	999.173	0.839852	3.18381e-11	2.86731e-08	NUDT8	NC_003076.8	19183523	19185644	+	1657	protein_coding	nudix hydrolase homolog 8	NUDIX
28719213	135.737	135.299	136.86	79.215	81.0758	68.1277	135.965	76.1395	0.835742	0.000154312	0.011255	AT3G09415	NC_003074.8	22365705	22366487	-	783	lncRNA	other RNA	-
819164	1879.34	1800.81	1747.3	1025.39	945.884	1071.18	1809.15	1014.15	0.834682	1.57197e-12	1.73031e-09	CYP76C1	NC_003071.7	18776015	18778676	-	2516	protein_coding	cytochrome P450%2C family 76%2C subfamily C%2C polypeptide 1	p450
828839	812.212	980.442	748.04	482.331	466.996	478.99	846.898	476.106	0.830891	5.32743e-08	1.70246e-05	BBX28	NC_003075.7	13675537	13677055	+	1427	protein_coding	B-box type zinc finger family protein	zf-B_box
835426	1588.01	1999	2071.64	1074.68	1126.41	981.038	1886.22	1060.71	0.830865	2.39849e-08	8.48595e-06	ORG1	NC_003076.8	21688763	21692480	+	2550	protein_coding	OBP3-responsive protein 1	Pkinase
834394	267.059	344.918	280.281	183.955	157.827	161.41	297.419	167.731	0.825344	1.17004e-05	0.00159645	MQD19.7	NC_003076.8	17564697	17569148	+	3280	protein_coding	Disease resistance protein (CC-NBS-LRR class) family	NB-ARC
839143	3950.71	5002.26	4085.16	2773.41	2136.08	2493.47	4346.04	2467.65	0.816362	1.30355e-07	3.79814e-05	TEM1	NC_003070.9	8981556	8983314	-	1759	protein_coding	AP2/B3 transcription factor family protein	AP2
821147	1765.68	2213.38	2392.23	925.055	1243.16	1485.18	2123.76	1217.8	0.803138	4.9475e-05	0.00524197	MS2	NC_003074.8	956862	961032	+	3042	protein_coding	methionine synthase 2	-
839268	853.044	938.519	963.641	414.559	574.016	595.331	918.401	527.969	0.800583	3.65017e-06	0.000592794	GLR3.4	NC_003070.9	1504941	1509152	+	3783	protein_coding	glutamate receptor 3.4	ANF_receptor
824625	385.139	382.077	453.699	192.757	261.604	248.404	406.971	234.255	0.800121	1.28113e-05	0.00171508	DJ1F	NC_003074.8	20210792	20213172	+	1752	protein_coding	Class I glutamine amidotransferase-like superfamily protein	DJ-1_PfpI
829779	1531.73	1658.84	1745.43	840.559	990.205	1012.48	1645.33	947.749	0.796844	3.38896e-09	1.64259e-06	FAH1	NC_003075.7	17137313	17139777	-	1992	protein_coding	ferulic acid 5-hydroxylase 1	p450
835989	235.056	175.317	200.602	84.496	127.559	140.448	203.658	117.501	0.796728	0.0012279	0.0488038	MZN1.13	NC_003076.8	23728588	23730142	+	1555	protein_coding	NAD(P)-binding Rossmann-fold superfamily protein	-
832538	175.464	228.675	174.355	108.261	124.316	101.667	192.831	111.415	0.793367	0.000247902	0.0160512	LSU2	NC_003076.8	8443279	8444101	-	823	protein_coding	response to low sulfur 2	-
838883	4053.34	4184.75	4102.04	2071.91	2445.24	2618.2	4113.37	2378.45	0.790699	8.72534e-10	5.23864e-07	GI	NC_003070.9	8061751	8067790	+	4303	protein_coding	gigantea protein (GI)	-
817800	313.408	322.05	309.34	214.761	137.288	192.854	314.933	181.634	0.790691	9.4678e-05	0.00797476	GLR3.5	NC_003071.7	13748280	13752281	-	3584	protein_coding	glutamate receptor 3.5	ANF_receptor
839958	140.151	123.865	156.545	69.5332	74.5897	99.5712	140.187	81.2314	0.790282	0.0012044	0.04838	AT1G30760	NC_003070.9	10918267	10920709	+	1927	protein_coding	FAD-binding Berberine family protein	FAD_binding_4
843622	1114.58	1044.28	934.582	418.079	672.388	705.383	1031.15	598.617	0.785757	0.000144064	0.0107306	F3N23.11	NC_003070.9	27435306	27437192	+	1776	protein_coding	Toll-Interleukin-Resistance (TIR) domain-containing protein	NB-ARC
823634	1953.28	1455.89	2291.93	845.84	1197.76	1276.61	1900.37	1106.74	0.780529	0.000221715	0.0147992	XTH31	NC_003074.8	16446935	16448844	-	1393	protein_coding	xyloglucan endo-transglycosylase-related 8	-
814902	249.402	249.636	281.218	172.513	127.559	155.121	260.086	151.731	0.774798	5.58801e-05	0.00579661	F19B11.20	NC_003071.7	1147774	1149261	-	1488	protein_coding	P-loop containing nucleoside triphosphate hydrolases superfamily protein	Sulfotransfer_1
840859	585.985	594.554	633.678	287.815	331.87	444.402	604.739	354.696	0.771473	3.79034e-05	0.00436616	GLR3.3	NC_003070.9	15973054	15976813	+	3428	protein_coding	glutamate receptor 3.3	Lig_chan
817515	1955.49	2049.5	1848.54	1248.96	1084.25	1096.33	1951.18	1143.18	0.770621	5.54134e-10	3.9211e-07	PHT4%3B1	NC_003071.7	12673099	12676092	-	2308	protein_coding	phosphate transporter 4%3B1	MFS_1
834714	1642.08	1718.87	1447.34	679.489	1053.98	1087.95	1602.76	940.473	0.769992	7.2417e-05	0.00702505	MZA15.12	NC_003076.8	18952603	18954692	-	1479	protein_coding	PLATZ transcription factor family protein	-
830302	227.331	193.421	246.535	99.4588	142.693	151.977	222.429	131.376	0.763745	0.000755643	0.0352272	PAL3	NC_003076.8	1160569	1163957	+	2609	protein_coding	phenyl alanine ammonia-lyase 3	-
835480	388.449	470.689	373.083	172.513	298.359	256.789	410.74	242.553	0.763161	0.000676003	0.0325879	TAT7	NC_003076.8	21910471	21912809	+	1665	protein_coding	Tyrosine transaminase family protein	Aminotran_1_2
821387	544.05	572.639	560.562	209.48	378.354	403.525	559.084	330.453	0.76111	0.00120364	0.04838	AT3G18560	NC_003074.8	6393747	6394842	+	1096	protein_coding	hypothetical protein	-
818235	238.367	211.524	222.162	161.071	115.668	120.534	224.018	132.424	0.753145	0.000267363	0.0168703	F13K3.3	NC_003071.7	15352491	15355330	-	1936	protein_coding	Sulfite exporter TauE/SafE family protein	-
818642	265.955	302.994	385.269	148.748	192.42	227.442	318.073	189.537	0.750564	0.000867276	0.0379323	ASG8	NC_003071.7	16906899	16908152	-	1254	protein_coding	hypothetical protein	-
828811	209.674	171.506	158.42	124.984	103.777	91.1863	179.867	106.649	0.748517	0.00094046	0.040158	FADA	NC_003075.7	13571813	13573070	+	1150	protein_coding	fatty acid desaturase A	-
816579	1077.06	1458.75	1282.35	760.464	697.251	818.58	1272.72	758.765	0.746588	2.03256e-06	0.000373371	GPRI1	NC_003071.7	8855302	8857758	+	1731	protein_coding	GBF's pro-rich region-interacting factor 1	-
815058	26014	30166	23488.3	18867.3	13830.4	14798.4	26556.1	15832	0.746139	4.27811e-06	0.000683566	LHCB2.1	NC_003071.7	1822990	1824480	-	1406	protein_coding	photosystem II light harvesting complex protein 2.1	-
836022	178.775	184.845	165.919	107.38	99.4529	109.004	176.513	105.279	0.744467	0.00016002	0.0115711	K18B18.4	NC_003076.8	23839108	23842958	-	3535	protein_coding	G patch domain protein	-
818505	364.171	283.938	264.345	147.868	170.8	226.393	304.151	181.687	0.744019	0.000874536	0.0379982	MLO12	NC_003071.7	16356041	16359943	-	2091	protein_coding	Seven transmembrane MLO family protein	-
831568	216.296	220.099	240.91	119.703	142.693	143.592	225.768	135.329	0.741864	7.91289e-05	0.00735358	UGT78D2	NC_003076.8	5607788	5609589	-	1620	protein_coding	UDP-glucosyl transferase 78D2	UDPGT
836863	367.482	377.313	468.697	250.848	221.607	253.645	404.497	242.033	0.741061	1.98488e-05	0.00252165	RLK	NC_003076.8	26842114	26845294	-	2740	protein_coding	receptor-like kinase	Pkinase
831135	2805.22	2948	2888.11	1324.65	1778.26	2077.37	2880.44	1726.76	0.738767	2.02683e-05	0.0025578	T24H18.120	NC_003076.8	4092519	4097059	+	3437	protein_coding	proline-tRNA ligase (DUF1680)	-
818446	157.808	147.686	144.359	73.0538	99.4529	98.5231	149.951	90.3433	0.735181	0.00110491	0.0457026	T6A23.16	NC_003071.7	16157521	16158660	-	981	protein_coding	LURP-one-like protein (DUF567)	-
838677	595.917	365.879	520.254	262.29	302.683	328.061	494.017	297.678	0.730893	0.000520696	0.0270067	XCP2	NC_003070.9	7252111	7253747	+	1378	protein_coding	xylem cysteine peptidase 2	Peptidase_C1
831765	1575.87	1706.48	1491.39	655.724	1136.14	1093.19	1591.25	961.684	0.727481	0.00045786	0.0247123	SR1	NC_003076.8	313190	315405	-	2216	protein_coding	serine/threonine protein kinase 1	Pkinase
842501	169.947	166.742	204.352	103.86	115.668	107.956	180.347	109.161	0.726728	0.00038011	0.0215435	AT1G62050	NC_003070.9	22936049	22939024	-	2299	protein_coding	Ankyrin repeat family protein	-
821964	2999.45	3052.81	3478.67	1580.78	2150.13	2044.88	3176.97	1925.26	0.723175	2.92836e-06	0.000500168	SAHH2	NC_003074.8	8587622	8589754	-	1932	protein_coding	S-adenosyl-l-homocysteine (SAH) hydrolase 2	-
830032	29753.9	28531.9	29292.6	11458.9	20463.5	21134.3	29192.8	17685.6	0.723093	0.000702746	0.0336033	PRP4	NC_003075.7	18096606	18098633	-	1935	protein_coding	proline-rich protein 4	-
843623	906.014	888.02	841.78	492.013	625.905	480.038	878.604	532.652	0.722815	2.41714e-06	0.000420095	F3N23.12	NC_003070.9	27437899	27439209	+	1217	protein_coding	Toll-Interleukin-Resistance (TIR) domain family protein	TIR
826147	523.082	463.066	528.69	215.641	343.761	361.601	504.946	307.001	0.72031	0.000707198	0.0336033	AT4G06744	NC_003075.7	4070549	4072470	-	1922	protein_coding	Leucine-rich repeat (LRR) family protein	-
824033	1244.8	1607.39	1554.2	659.245	1008.58	1010.39	1468.8	892.738	0.719534	0.000257766	0.0164216	DCF	NC_003074.8	18046144	18049474	+	1855	protein_coding	HXXXD-type acyl-transferase family protein	-
820111	391.76	360.162	449.949	235.005	248.632	248.404	400.624	244.014	0.716306	1.17641e-05	0.00159645	AT3G09540	NC_003074.8	2928752	2931362	-	1783	protein_coding	Pectin lyase-like superfamily protein	-
827498	302.373	399.228	413.391	176.033	241.065	264.126	371.664	227.075	0.714535	0.000847044	0.0373599	TPS5	NC_003075.7	9876172	9880386	+	3403	protein_coding	trehalose phosphatase/synthase 5	-
837113	2391.39	2149.54	2023.83	1630.95	1225.87	1163.41	2188.26	1340.08	0.706582	1.84873e-05	0.00239405	STO	NC_003070.9	1828340	1829983	-	1475	protein_coding	B-box zinc finger family protein	zf-B_box
837867	464.594	525.952	531.502	234.124	348.085	353.216	507.349	311.808	0.705334	0.000294928	0.0179852	CYP71B29	NC_003070.9	4463859	4465725	+	1784	protein_coding	cytochrome P450%2C family 71%2C subfamily B%2C polypeptide 29	p450
836031	452.455	478.311	377.77	226.203	271.334	306.05	436.179	267.862	0.705002	0.00012052	0.00940104	MNC17.3	NC_003076.8	23869980	23873849	-	2664	protein_coding	Subtilase family protein	Peptidase_S8
836457	526.393	519.282	510.88	292.215	312.412	351.12	518.852	318.582	0.704766	1.6241e-06	0.00031241	K9H21.11	NC_003076.8	25387411	25390227	-	2060	protein_coding	AMP-dependent synthetase and ligase family protein	AMP-binding
831772	382.932	378.266	374.02	235.885	206.473	255.741	378.406	232.699	0.70069	1.22303e-05	0.00164843	F9G14.140	NC_003076.8	644279	648538	-	2855	protein_coding	Tetratricopeptide repeat (TPR)-like superfamily protein	-
842600	290.233	283.938	242.785	139.066	176.205	189.709	272.319	168.327	0.696365	0.000376153	0.0214892	AT1G62975	NC_003070.9	23328727	23330812	+	1554	protein_coding	basic helix-loop-helix (bHLH) DNA-binding superfamily protein	HLH
834768	2284.35	2259.11	1713.56	1167.1	1524.22	1181.23	2085.67	1290.85	0.692384	6.24915e-05	0.00625326	ERF2	NC_003076.8	19171643	19172956	-	1314	protein_coding	ethylene responsive element binding factor 2	AP2
828895	832.076	743.192	708.67	551.865	459.429	401.429	761.313	470.908	0.691053	3.15379e-05	0.00374168	BGLU9	NC_003075.7	13857650	13860745	-	1965	protein_coding	beta glucosidase 9	Glyco_hydro_1
829321	661.026	562.158	763.976	332.703	410.784	490.519	662.387	411.335	0.688799	0.000389737	0.0218749	BAT1	NC_003075.7	15440971	15444006	+	1841	protein_coding	HXXXD-type acyl-transferase family protein	-
829458	2310.83	2206.71	2312.55	1146.86	1596.65	1496.71	2276.7	1413.41	0.688461	6.84629e-06	0.00102762	PME44	NC_003075.7	16022269	16026428	+	3570	protein_coding	pectin methylesterase 44	-
844105	691.925	575.498	736.792	345.025	438.89	463.268	668.072	415.728	0.685793	9.88955e-05	0.00816423	LAX3	NC_003070.9	29200417	29203418	-	2329	protein_coding	like AUX1 3	Aa_trans
841839	7053.89	7836.87	8414.05	3583.16	5664.49	5242.69	7768.27	4830.11	0.685777	0.000176373	0.012348	F15I1.9	NC_003070.9	20158589	20160864	-	1543	protein_coding	GDSL-like Lipase/Acylhydrolase superfamily protein	Lipase_GDSL
825294	507.633	531.668	434.951	289.575	348.085	279.848	491.417	305.836	0.684874	4.28309e-05	0.00476746	SDR1	NC_003074.8	22662849	22664493	+	1337	protein_coding	NAD(P)-binding Rossmann-fold superfamily protein	adh_short
831455	258.231	301.088	321.526	169.872	168.638	211.72	293.615	183.41	0.681144	0.000297304	0.0180689	F1N13.120	NC_003076.8	5213062	5215674	+	2613	protein_coding	Pentatricopeptide repeat (PPR) superfamily protein	-
832234	278.094	381.124	266.22	204.199	201.068	171.891	308.48	192.386	0.681123	0.000869279	0.0379362	T10F18.130	NC_003076.8	7168106	7170961	+	2170	protein_coding	Plant L-ascorbate oxidase	-
835504	5330.14	5607.29	6045.25	2869.34	3818.13	3940.92	5660.9	3542.8	0.676466	1.04573e-05	0.00147994	OMT1	NC_003076.8	21981902	21984399	+	1497	protein_coding	O-methyltransferase 1	-
837886	7852.86	8549.57	8514.35	4849.72	5116.42	5631.54	8305.59	5199.23	0.675942	4.38537e-09	1.97471e-06	RAV1	NC_003070.9	4542168	4543970	+	1803	protein_coding	related to ABI3/VP1 1	AP2
825068	358.654	421.142	525.878	223.562	288.63	307.099	435.225	273.097	0.675289	0.00102538	0.0427702	IPMI1	NC_003074.8	21797058	21798303	-	1246	protein_coding	isopropylmalate isomerase 1	-
818169	333.272	320.144	263.408	200.678	192.42	180.276	305.608	191.125	0.675156	0.000147364	0.0108945	NHL12	NC_003071.7	15106940	15108086	+	1147	protein_coding	NDR1/HIN1-like 12	-
838413	1190.73	1253.9	1260.79	805.353	728.601	790.281	1235.14	774.745	0.672597	1.90635e-08	7.24449e-06	EPR1	NC_003070.9	6305814	6308243	-	2026	protein_coding	Homeodomain-like superfamily protein	Myb_DNA-binding
838991	345.411	336.342	303.716	154.909	224.85	240.019	328.49	206.593	0.671991	0.00108801	0.0450977	ALDH2B7	NC_003070.9	8412051	8414886	-	1966	protein_coding	aldehyde dehydrogenase 2B7	Aldedh
825355	620.195	628.855	631.804	330.063	414.027	438.113	626.951	394.068	0.671932	1.98545e-05	0.00252165	F21F14.7	NC_003074.8	22879720	22881775	-	2056	protein_coding	Eukaryotic aspartyl protease family protein	-
843582	800.073	870.869	970.203	517.538	580.502	561.791	880.382	553.277	0.67147	1.85504e-06	0.000353404	T10D10.3	NC_003070.9	27295147	27298715	-	2769	protein_coding	inter alpha-trypsin inhibitor%2C heavy chain-like protein	-
817561	227.331	212.477	210.914	149.628	122.154	136.255	216.907	136.013	0.669925	0.000341785	0.0200943	T27E13.16	NC_003071.7	12847518	12849708	+	2010	protein_coding	pentatricopeptide (PPR) repeat-containing protein	-
835587	1420.27	2329.62	1669.5	957.621	1317.75	1140.35	1806.46	1138.58	0.666646	0.00122915	0.0488038	PDC2	NC_003076.8	22310553	22312832	-	2280	protein_coding	pyruvate decarboxylase-2	TPP_enzyme_N
837683	481.147	455.444	413.391	216.521	325.384	311.291	449.994	284.399	0.664268	0.000630517	0.030694	T23J18.8	NC_003070.9	3840877	3844479	+	3099	protein_coding	S-locus lectin protein kinase family protein	Pkinase_Tyr
821710	290.233	309.664	320.589	198.038	224.85	159.314	306.829	194.067	0.661598	0.000396386	0.0221373	UGT84A2	NC_003074.8	7595680	7597607	+	1928	protein_coding	UDP-Glycosyltransferase superfamily protein	UDPGT
839843	2033.84	1798.91	1899.16	909.212	1438.82	1287.09	1910.64	1211.71	0.657706	0.000290452	0.0178718	F15D2.21	NC_003070.9	10371675	10374005	+	1756	protein_coding	GDSL-like Lipase/Acylhydrolase superfamily protein	Lipase_GDSL
837997	276.991	294.419	298.091	184.835	161.07	205.431	289.834	183.779	0.657251	0.000175925	0.012348	FLP	NC_003070.9	4907887	4911168	+	2343	protein_coding	Duplicated homeodomain-like superfamily protein	Myb_DNA-binding
837387	261.541	345.87	307.465	204.199	183.772	193.902	304.959	193.957	0.653281	0.000314622	0.0188326	PPCK1	NC_003070.9	2752124	2753809	+	1565	protein_coding	phosphoenolpyruvate carboxylase kinase 1	Pkinase
835695	617.988	797.503	741.479	350.306	503.751	520.915	718.99	458.324	0.651786	0.000782527	0.0360563	MDA7.1	NC_003076.8	22667220	22669631	+	2331	protein_coding	RING/U-box superfamily protein	-
843247	585.985	882.303	774.287	497.294	418.351	512.53	747.525	476.058	0.651384	0.000504071	0.026213	F4N2.12	NC_003070.9	25999837	26001614	+	1778	protein_coding	suppressor	-
815055	17696.5	20989.5	16576.9	13769.3	10364.7	11095.4	18421	11743.1	0.649459	3.34319e-05	0.00389639	LHCB2.2	NC_003071.7	1799234	1800472	-	1143	protein_coding	photosystem II light harvesting complex protein 2.2	-
838947	6403.9	7674.89	8668.08	4993.19	4236.48	5304.53	7582.29	4844.73	0.646258	3.50783e-05	0.00406436	F26F24.26	NC_003070.9	8308965	8310916	-	1952	protein_coding	Kelch repeat-containing F-box family protein	-
818241	520.875	492.603	492.132	333.583	322.141	315.484	501.87	323.736	0.631511	5.01483e-06	0.000788562	F13K3.9	NC_003071.7	15379660	15382131	+	1466	protein_coding	2-oxoglutarate (2OG) and Fe(II)-dependent oxygenase superfamily protein	2OG-FeII_Oxy
832528	459.077	533.574	492.132	242.046	374.029	344.831	494.927	320.302	0.6307	0.00120627	0.04838	K18P6.10	NC_003076.8	8405681	8406132	-	452	protein_coding	hypothetical protein	-
834116	1452.27	1774.13	1746.36	954.981	961.018	1301.76	1657.59	1072.59	0.62859	0.000210227	0.0143135	MEE6.21	NC_003076.8	16468327	16472810	+	3615	protein_coding	Myosin heavy chain-related protein	-
828669	2710.32	2919.41	2363.17	1424.11	1962.03	1796.47	2664.3	1727.54	0.625501	0.000100807	0.00825719	DTX35	NC_003075.7	13076444	13079256	-	2308	protein_coding	detoxifying efflux carrier 35	MatE
838870	615.781	854.671	859.59	533.381	468.077	509.385	776.681	503.615	0.62542	0.000309063	0.0186274	MYB3	NC_003070.9	8006064	8007465	+	1401	protein_coding	myb domain protein 3	Myb_DNA-binding
816092	15730	13592.8	11878.7	6972.68	10086.9	9676.23	13733.8	8911.94	0.623982	0.000428576	0.0234993	COR413-PM1	NC_003071.7	6949851	6951192	+	1086	protein_coding	cold regulated 413 plasma membrane 1	-
842747	1752.44	1648.36	1844.79	858.163	1225.87	1323.77	1748.53	1135.93	0.623076	0.000470068	0.0249595	GH9C2	NC_003070.9	23911024	23915236	+	2762	protein_coding	glycosyl hydrolase 9C2	-
818280	2479.68	2830.8	2706.26	1282.4	2000.95	1952.64	2672.24	1745.33	0.615187	0.000832489	0.0373599	PAL1	NC_003071.7	15557367	15560755	-	2931	protein_coding	PHE ammonia lyase 1	-
837953	54610.2	55022.9	48398.6	26984.2	38543.4	37777.3	52677.2	34435	0.613332	0.000159234	0.0115564	F16A14.14	NC_003070.9	4760957	4762666	+	1032	protein_coding	oleosin-B3-like protein	-
828792	1377.23	1578.81	1422.96	822.076	937.236	1105.76	1459.67	955.025	0.612871	5.75533e-05	0.00590831	VTC2	NC_003075.7	13498956	13501701	-	2191	protein_coding	GDP-L-galactose phosphorylase 1	-
839930	1267.98	1539.74	1506.39	759.584	1032.36	1037.64	1438.04	943.195	0.609672	0.000286383	0.0176763	RFNR2	NC_003070.9	10806930	10809188	-	1573	protein_coding	root FNR 2	NAD_binding_1
825736	784.624	854.671	779.912	584.431	504.832	496.808	806.402	528.69	0.607992	1.1465e-05	0.00157748	PUX4	NC_003075.7	2029855	2031942	+	1720	protein_coding	plant UBX domain containing protein 4	UBX
843291	418.245	436.387	433.076	254.368	286.468	306.05	429.236	282.295	0.606544	7.0087e-05	0.00690862	F10D13.24	NC_003070.9	26148021	26153600	-	5244	protein_coding	disease resistance protein (TIR-NBS-LRR class)	LRR_3
834003	259.334	288.702	304.653	168.992	180.529	211.72	284.23	187.08	0.606097	0.000769792	0.0356156	MUD12.40	NC_003076.8	16034441	16039096	+	4001	protein_coding	Disease resistance protein (NBS-LRR class) family	NB-ARC
817403	1638.77	1757.94	1771.67	1183.82	1055.07	1158.17	1722.79	1132.35	0.605233	3.16982e-07	7.75353e-05	RAP2.7	NC_003071.7	12225656	12228624	-	2633	protein_coding	related to AP2.7	AP2
842381	524.186	570.734	521.191	323.901	364.3	376.274	538.704	354.825	0.603954	3.19657e-05	0.00376462	T7P1.4	NC_003070.9	22412188	22417312	-	3168	protein_coding	Phosphatidylinositol-4-phosphate 5-kinase family protein	PIP5K
844187	295.751	331.578	286.843	233.244	187.015	180.276	304.724	200.178	0.603542	0.000953901	0.0406444	SPS1	NC_003070.9	29535060	29537482	-	1894	protein_coding	solanesyl diphosphate synthase 1	-
837028	1697.26	1554.03	1617.94	822.076	1100.47	1286.04	1623.08	1069.53	0.602459	0.000650833	0.031528	RCI3	NC_003070.9	1529767	1531484	+	1254	protein_coding	Peroxidase superfamily protein	-
820639	1539.45	2362.97	2015.4	1213.75	1339.37	1346.83	1972.61	1299.98	0.602191	0.00052638	0.0271593	ESM1	NC_003074.8	4729399	4731847	+	1951	protein_coding	GDSL-like lipase/acylhydrolase superfamily protein	Lipase_GDSL
843833	597.02	666.015	796.785	462.088	402.136	494.712	686.607	452.978	0.600454	0.000351084	0.0203989	F25A4.9	NC_003070.9	28145978	28147485	+	1395	protein_coding	cyclin-dependent kinase%2C putative (DUF581)	-
820905	563.914	520.235	625.242	398.716	352.409	376.274	569.797	375.8	0.599689	5.74096e-05	0.00590831	MDC8.3	NC_003074.8	5635593	5638798	-	2952	protein_coding	Protein phosphatase 2C family protein	PP2C
818348	1586.9	1180.53	1179.24	760.464	913.453	930.729	1315.56	868.215	0.599569	0.000419704	0.0231225	RLK	NC_003071.7	15814531	15817088	-	2558	protein_coding	receptor lectin kinase	Pkinase
839933	355.343	460.208	419.015	279.893	276.739	260.981	411.522	272.538	0.595421	0.000324117	0.0192845	UGT78D1	NC_003070.9	10814612	10816615	+	1908	protein_coding	UDP-glucosyl transferase 78D1	UDPGT
841029	1153.21	1485.43	1362.03	1094.93	752.383	801.81	1333.56	883.04	0.594031	0.00119525	0.0482311	CH1	NC_003070.9	16848308	16851271	-	2318	protein_coding	Pheophorbide a oxygenase family protein with Rieske 2Fe-2S domain-containing protein	-
838760	1081.48	1084.3	1094.88	690.051	668.064	812.291	1086.88	723.469	0.587497	1.07622e-05	0.00151228	F24J8.18	NC_003070.9	7566229	7570014	-	3061	protein_coding	kinase with adenine nucleotide alpha hydrolases-like domain-containing protein	Pkinase
831081	252.713	297.277	299.966	205.079	177.286	183.421	283.319	188.595	0.586632	0.000839513	0.0373599	MSL10	NC_003076.8	3897893	3901790	-	2982	protein_coding	mechanosensitive channel of small conductance-like 10	-
843022	265.955	239.156	265.282	157.55	170.8	185.517	256.798	171.289	0.585434	0.000846488	0.0373599	ZFP6	NC_003070.9	25016402	25017512	+	1111	protein_coding	zinc finger protein 6	-
827632	2991.72	3408.2	3541.47	1714.56	2419.3	2512.34	3313.8	2215.4	0.581444	0.000707242	0.0336033	F13C5.1	NC_003075.7	10388722	10391298	-	2093	protein_coding	GDSL-like Lipase/Acylhydrolase superfamily protein	Lipase_GDSL
818436	18327.7	19900.4	16086.6	11123.5	12559.2	12627.7	18104.9	12103.5	0.581001	7.15101e-06	0.00105734	LP1	NC_003071.7	16130290	16131240	+	832	protein_coding	lipid transfer protein 1	-
825495	1007.54	982.348	1167.99	723.497	586.988	800.762	1052.63	703.749	0.580698	0.000339504	0.0200196	PLP9	NC_003074.8	23345754	23347672	+	1834	protein_coding	PATATIN-like protein 9	-
836598	1921.28	1675.99	1828.86	1158.3	1210.73	1262.98	1808.71	1210.67	0.579192	1.44888e-06	0.000285168	RGF9	NC_003076.8	25897321	25898171	-	686	protein_coding	root meristem growth factor	-
826761	1330.88	1539.74	1343.29	922.415	916.697	983.135	1404.64	940.749	0.578641	4.56057e-06	0.000722868	F25E4.190	NC_003075.7	7004265	7006125	+	1861	protein_coding	Haloacid dehalogenase-like hydrolase (HAD) superfamily protein	-
834107	335.479	294.419	281.218	201.558	195.663	212.768	303.705	203.33	0.57752	0.000584185	0.0293024	MEE6.12	NC_003076.8	16433243	16434458	-	1136	protein_coding	Pollen Ole e 1 allergen and extensin family protein	-
829845	602.538	644.1	688.047	462.968	402.136	437.065	644.895	434.056	0.570734	5.27361e-05	0.00552837	AP2	NC_003075.7	17400610	17403469	+	1995	protein_coding	Integrase-type DNA-binding superfamily protein	AP2
827403	4447.3	4704.03	4463.87	3113.15	2731.71	3335.11	4538.4	3059.99	0.56859	3.53309e-06	0.000578522	RPP5	NC_003075.7	9538233	9544755	-	5801	protein_coding	Disease resistance protein (TIR-NBS-LRR class) family	TIR
844383	6387.34	8041.72	6763.3	3907.94	5052.64	5346.45	7064.12	4769.01	0.567042	0.000460245	0.0247123	Kelch_repeat_F-box_20	NC_003070.9	30241452	30243176	+	1725	protein_coding	Galactose oxidase/kelch repeat superfamily protein	Kelch_1
817481	478.94	529.763	432.139	312.459	353.49	307.099	480.281	324.349	0.566995	0.000334831	0.019803	F16P2.30	NC_003071.7	12592129	12593803	+	1478	protein_coding	NAD(P)-binding Rossmann-fold superfamily protein	adh_short
821471	656.612	527.857	674.924	385.513	397.812	473.749	619.798	419.025	0.565131	0.000734582	0.034653	AT3G19370	NC_003074.8	6710349	6713678	+	2869	protein_coding	filament-like protein (DUF869)	-
818260	5348.9	5413.87	5698.42	3083.22	4150	3919.96	5487.06	3717.73	0.561921	9.09666e-05	0.00783418	MAT3	NC_003071.7	15479281	15481412	-	1839	protein_coding	methionine adenosyltransferase 3	-
820363	353.136	346.823	308.403	209.48	250.794	224.297	336.121	228.19	0.559836	0.000765379	0.0355139	ANT1	NC_003074.8	3758452	3760751	+	1995	protein_coding	aromatic and neutral transporter 1	Aa_trans
817736	425.97	463.066	537.127	332.703	314.574	321.772	475.388	323.016	0.558042	0.000376076	0.0214892	F20M17.17	NC_003071.7	13518199	13520364	+	1641	protein_coding	UDP-Glycosyltransferase superfamily protein	UDPGT
836263	456.869	498.32	479.008	334.463	321.06	321.772	478.066	325.765	0.553361	7.72342e-05	0.00728686	MYB28	NC_003076.8	24689069	24691187	-	1979	protein_coding	myb domain protein 28	Myb_DNA-binding
820341	424.866	470.689	479.008	268.451	316.736	354.264	458.188	313.15	0.55157	0.000898263	0.0386058	AT3G11690	NC_003074.8	3694956	3696749	+	1794	protein_coding	hypothetical protein	-
835667	1146.59	1032.85	1315.16	755.183	685.36	945.402	1164.87	795.315	0.550766	0.00122797	0.0488038	FLA1	NC_003076.8	22558044	22560541	-	1755	protein_coding	FASCICLIN-like arabinogalactan 1	-
833664	1148.79	1221.5	1231.74	676.848	837.783	946.451	1200.68	820.361	0.550669	0.000438775	0.0239489	CAT3	NC_003076.8	14590115	14594384	+	2292	protein_coding	cationic amino acid transporter 3	-
834579	3860.22	3637.83	3334.31	2240.02	2509.02	2667.46	3610.79	2472.17	0.546672	1.73528e-05	0.00226479	MFC19.10	NC_003076.8	18407150	18411977	+	2873	protein_coding	Protein kinase superfamily protein	Pkinase
827027	2899.02	2894.64	3322.12	1697.84	2147.97	2404.38	3038.6	2083.4	0.544944	0.00061888	0.0302762	SHM4	NC_003075.7	8047692	8050157	-	1873	protein_coding	serine hydroxymethyltransferase 4	SHMT
819204	23692.1	21537.3	20120.2	11819.8	16301.6	16767.8	21783.2	14963.1	0.54186	0.000832169	0.0373599	PIP1B	NC_003071.7	18910081	18911982	+	1597	protein_coding	plasma membrane intrinsic protein 1B	-
820339	484.458	623.138	561.499	375.831	358.895	415.055	556.365	383.26	0.538724	0.00075271	0.0351732	DGD1	NC_003074.8	3680866	3684871	-	3104	protein_coding	UDP-Glycosyltransferase superfamily protein	-
824606	2666.18	2656.44	2995.91	1983.9	1886.36	1875.08	2772.84	1915.11	0.533892	3.25342e-06	0.00055094	T14E10.1	NC_003074.8	20140025	20142763	-	1708	protein_coding	Eukaryotic aspartyl protease family protein	-
821357	2201.58	2543.05	2521.59	1413.55	1735.02	1875.08	2422.07	1674.55	0.533138	0.000344051	0.0201677	BTS	NC_003074.8	6273966	6280562	+	4495	protein_coding	zinc finger protein-like protein	zf-CHY
833509	907.118	791.786	785.536	544.823	634.553	543.973	828.146	574.45	0.527776	0.000221553	0.0147992	MOK9.4	NC_003076.8	13672463	13675503	+	2238	protein_coding	membrane protein	-
839531	708.479	700.316	676.798	552.745	490.779	405.622	695.198	483.048	0.523823	0.000894699	0.0385362	DBE1	NC_003070.9	813413	816812	+	3076	protein_coding	debranching enzyme 1	-
820294	520.875	542.149	526.815	367.03	368.624	371.034	529.947	368.896	0.522897	8.55829e-05	0.00760383	SS2	NC_003074.8	62245	66111	-	3023	protein_coding	starch synthase 2	Glycos_transf_1
827650	1535.04	1549.27	1610.44	964.663	1183.71	1121.49	1564.92	1089.95	0.522702	5.83724e-05	0.0059615	ERD3	NC_003075.7	10460241	10464306	-	3581	protein_coding	S-adenosyl-L-methionine-dependent methyltransferases superfamily protein	-
818633	881.736	946.141	901.773	688.29	590.231	620.486	909.883	633.003	0.522638	6.28413e-05	0.00625666	BPG3	NC_003071.7	16869189	16873338	+	3094	protein_coding	DUF399 family protein%2C putative (DUF399 and DUF3411)	-
834786	983.262	1178.63	1154.87	727.018	819.406	781.896	1105.59	776.106	0.511617	0.000185624	0.0129045	KUA1	NC_003076.8	19226769	19228895	+	1679	protein_coding	myb-like transcription factor family protein	Myb_DNA-binding
832129	708.479	702.222	668.362	519.298	463.753	476.894	693.021	486.648	0.508797	0.000108928	0.00880896	NUDX19	NC_003076.8	6779841	6782501	+	1562	protein_coding	nudix hydrolase homolog 19	NUDIX
844110	802.28	923.274	957.079	561.546	618.338	709.576	894.211	629.82	0.507023	0.000837528	0.0373599	PIP5K2	NC_003070.9	29220349	29224426	+	3113	protein_coding	phosphatidylinositol-4-phosphate 5-kinase 2	MORN
824384	449.145	508.801	447.137	302.777	359.976	330.157	468.361	330.97	0.502695	0.00107794	0.0447742	PHF1	NC_003074.8	19353867	19357261	-	1798	protein_coding	phosphate transporter traffic facilitator1	-
824772	723.928	670.779	585.871	414.559	491.86	492.615	660.193	466.345	0.501999	0.00123626	0.048988	AT3G56060	NC_003074.8	20803038	20806333	-	2374	protein_coding	Glucose-methanol-choline (GMC) oxidoreductase family protein	-
824742	875.115	1017.6	786.474	663.646	568.611	659.266	893.063	630.508	0.501758	0.00117432	0.0477757	AT3G55760	NC_003074.8	20700314	20703130	+	2315	protein_coding	hypothetical protein	-
837452	22149.3	25038	22182.5	14330.9	18533.9	16149.4	23123.3	16338.1	0.501171	0.000250887	0.0161916	T31J12.3	NC_003070.9	3008910	3009898	+	989	protein_coding	plant/protein (Protein of unknown function%2C DUF538)	-
827230	4687.88	5613.01	5145.36	3402.72	3517.61	3997.52	5148.75	3639.28	0.500778	0.000112506	0.00898595	CLA1	NC_003075.7	8883825	8887667	+	2960	protein_coding	Deoxyxylulose-5-phosphate synthase	-
827397	4112.93	4018.96	3514.29	2382.61	2689.55	3163.22	3882.06	2745.13	0.500106	0.000681009	0.0327496	SNC1	NC_003075.7	9500271	9505972	-	5116	protein_coding	TIR-NBS-LRR class disease resistance protein	LRR_3

## Sheet: OEvsWT_deg_down
gene_id	OE1	OE2	OE3	WT1	WT2	WT3	OE	WT	log2FoldChange	pvalue	padj	gene_name	gene_chr	gene_start	gene_end	gene_strand	gene_length	gene_biotype	gene_description	tf_family
838379	20.9674	23.8203	14.0609	294.856	417.27	31.4435	19.6162	247.856	-3.65994	0.000130835	0.00990749	T10F20.3	NC_003070.9	6192033	6194093	-	1570	protein_coding	FMN-linked oxidoreductases superfamily protein	Oxidored_FMN
2745868	3.31065	4.76405	3.74958	66.0125	41.0784	32.4917	3.94143	46.5275	-3.55939	3.01e-09	1.57e-06	AT3G01345	NC_003074.8	129138	130749	+	1612	protein_coding	Expressed protein	-
823768	20.9674	6.66968	7.49915	100.339	132.964	54.5021	11.7121	95.9351	-3.05788	6.05e-10	4e-07	HSP17.4	NC_003074.8	16984118	16984867	-	724	protein_coding	heat shock protein 17.4	-
835127	15.4497	18.1034	16.8731	178.674	81.0758	158.266	16.8087	139.338	-3.05138	1.51e-15	3.74e-12	SAE1B	NC_003076.8	20585349	20587761	+	1474	protein_coding	SUMO-activating enzyme 1B	-
28718015	5.51775	5.71686	6.56176	39.6075	43.2404	25.1548	5.93212	36.0009	-2.59901	1.89e-06	0.000354349	AT2G08735	NC_003071.7	14907257	14907716	+	460	lncRNA	other RNA	-
841789	20.9674	8.5753	17.8105	73.934	107.02	58.6946	15.7844	79.8829	-2.34731	2.18e-08	7.84e-06	F22G10.20	NC_003070.9	19980299	19981199	+	901	protein_coding	HSP20-like chaperones superfamily protein	-
819100	229.538	284.89	233.411	1446.99	1076.69	996.76	249.28	1173.48	-2.2349	5.45e-32	5.4e-28	HB4	NC_003071.7	18517656	18519731	-	1394	protein_coding	homeobox-leucine zipper protein 4	Homeobox
839415	6.6213	7.62249	6.56176	20.2438	44.3214	29.3473	6.93518	31.3042	-2.16636	0.000118563	0.0092849	CUL2	NC_003070.9	677360	681378	+	2488	protein_coding	cullin 2	Cullin
831076	147.876	48.5934	59.9932	256.129	551.315	275.655	85.4874	361.033	-2.08285	2.53e-07	6.78e-05	HSP17.6A	NC_003076.8	3883957	3884838	-	882	protein_coding	heat shock protein 17.6A	-
841428	182.086	121.007	164.044	761.344	447.538	430.777	155.712	546.553	-1.81431	3.69e-12	3.66e-09	F2J10.8	NC_003070.9	18542061	18544034	+	1769	protein_coding	formin-like protein%2C putative (DUF1005)	-
3767991	26.4852	29.5371	19.6853	88.0167	95.1289	62.8871	25.2359	82.0109	-1.70309	5.39e-07	0.000122649	51593.RRNA00001	NC_003071.7	3706	5513	+	1808	rRNA	18S ribosomal RNA	-
837252	67.3165	47.6405	90.9272	165.471	332.951	163.506	68.6281	220.643	-1.68261	9.13e-07	0.00019253	F22G5.25	NC_003070.9	2274926	2275783	+	858	protein_coding	HSP20-like chaperones superfamily protein	-
3768403	15.4497	20.009	14.9983	74.8142	37.8354	44.021	16.819	52.2235	-1.63934	0.000141171	0.0105548	AT2G12646	NC_003071.7	5166984	5169303	-	1404	protein_coding	PLATZ transcription factor family protein	-
837745	25.3816	23.8203	28.1218	88.8968	79.9947	71.272	25.7746	80.0545	-1.63617	1.76e-07	4.9e-05	T6A9.7	NC_003070.9	476945	479112	+	1317	protein_coding	transmembrane protein	-
4386139	14.3461	11.4337	21.5601	78.3348	34.5923	32.4917	15.78	48.4729	-1.62328	0.00111005	0.0458196	ycf1	NC_000932.1	123884	129244	-	5361	protein_coding	-	-
28720195	38.6242	42.8765	52.4941	141.707	135.126	135.207	44.6649	137.347	-1.61654	1.06e-10	8.4e-08	FLP1	NC_003075.7	15230008	15230382	+	375	protein_coding	flowering-promoting factor-like protein	-
832595	142.358	142.922	136.86	548.344	362.138	279.848	140.713	396.777	-1.49757	3.49e-09	1.65e-06	F21J6.107	NC_003076.8	8746594	8747290	-	697	protein_coding	stress induced protein	-
28720572	209.674	196.279	196.853	688.29	488.617	453.835	200.935	543.581	-1.43785	7.4e-13	9.78e-10	AT5G03615	NC_003076.8	7891346	7891734	+	389	lncRNA	other RNA	-
844733	152.29	148.638	143.421	675.968	236.741	257.837	148.117	390.182	-1.39949	7.31e-05	0.00703044	psbB	NC_000932.1	72371	73897	+	1527	protein_coding	-	-
834666	376.31	524.046	475.259	1104.61	1231.27	1282.9	458.538	1206.26	-1.39365	1.11e-17	3.66e-14	KAT1	NC_003076.8	18743510	18747406	-	3021	protein_coding	1	cNMP_binding
5008149	47.4526	48.5934	38.4332	179.554	82.1568	90.1382	44.8264	117.283	-1.3936	8.83e-05	0.00770855	AT4G20362	NC_003075.7	10989908	10992242	-	2206	lncRNA	other RNA	GTP_EFTU_D2
831720	1958.8	2403.94	1426.71	6140.04	5240.74	3760.65	1929.82	5047.14	-1.38714	8.07e-10	5e-07	FER1	NC_003076.8	227953	230051	-	1421	protein_coding	ferretin 1	Ferritin
28720240	22.071	20.009	30.934	79.215	61.6176	49.2615	24.338	63.3647	-1.38111	0.000171772	0.0121547	AT5G00430	NC_003076.8	7205078	7205379	-	302	misc_RNA	novel transcribed region~AT5G00430.1	-
824775	1657.53	1155.76	1265.48	4172.87	3489.5	2810	1359.59	3490.79	-1.361	1.67e-12	1.75e-09	FER3	NC_003074.8	20813904	20816035	-	1277	protein_coding	ferritin 3	Ferritin
2745703	28.6923	22.8675	35.621	45.7687	111.344	62.8871	29.0602	73.3333	-1.32989	0.00111948	0.0461128	AT4G12735	NC_003075.7	7493716	7494234	-	519	protein_coding	hypothetical protein	-
839490	55.1775	50.499	54.3688	206.839	102.696	91.1863	53.3484	133.574	-1.32905	0.000121457	0.0094034	T6A9.34	NC_003070.9	469818	470693	+	423	protein_coding	protoporphyrinogen oxidase-like protein	-
814939	60.6952	63.8383	44.0575	78.3348	229.174	111.101	56.197	139.536	-1.31006	0.000752038	0.0351732	F3L12.12	NC_003071.7	1337180	1339468	-	1835	protein_coding	MATE efflux family protein	MatE
816845	232.849	260.117	229.662	629.319	619.419	442.306	240.876	563.681	-1.22685	6.55e-11	5.4e-08	AGP17	NC_003071.7	9844134	9845385	+	1252	protein_coding	arabinogalactan protein 17	-
831296	124.701	115.29	107.8	340.625	268.09	187.613	115.93	265.443	-1.19827	1.45e-06	0.000285168	F18O22.240	NC_003076.8	4658441	4660175	+	1358	protein_coding	GDSL-like Lipase/Acylhydrolase superfamily protein	Lipase_GDSL
844754	311.201	204.854	262.47	914.493	430.242	407.718	259.509	584.151	-1.17267	0.000115756	0.00913731	rbcL	NC_000932.1	54958	56397	+	1440	protein_coding	-	RuBisCO_large
830708	1101.34	1155.76	1134.25	2460.07	2826.84	2340.45	1130.45	2542.45	-1.16903	1.96e-20	7.75e-17	BIM1	NC_003076.8	2606002	2610250	-	2934	protein_coding	basic helix-loop-helix (bHLH) DNA-binding superfamily protein	HLH
817652	845.319	884.208	840.842	2326.28	1792.31	1628.78	856.79	1915.79	-1.16139	8.65e-13	1.07e-09	F7F1.22	NC_003071.7	13193954	13200138	+	3295	protein_coding	Protein kinase superfamily protein	Pkinase_Tyr
5008122	38.6242	60.9799	46.8697	119.703	92.9669	113.197	48.8246	108.622	-1.15079	4.18e-05	0.00467584	AT4G04223	NC_003075.7	2036511	2037816	+	565	ncRNA	other RNA	-
836884	1362.88	2287.7	1506.39	4895.49	3199.79	3115.01	1718.99	3736.76	-1.12021	2.04e-06	0.000373371	BT4	NC_003076.8	26930539	26933352	-	2491	protein_coding	BTB and TAZ domain protein 4	zf-TAZ
837649	93.8017	89.5642	89.0524	248.207	168.638	167.699	90.8061	194.848	-1.10541	3.43e-06	0.000570739	scpl31	NC_003070.9	3694328	3698013	-	2322	protein_coding	serine carboxypeptidase-like 31	Peptidase_S10
817360	25.3816	29.5371	34.6836	65.1323	70.2657	57.6465	29.8674	64.3482	-1.10249	0.000611455	0.0302113	F24D13.7	NC_003071.7	11994954	11996236	+	1201	protein_coding	enabled-like protein (DUF1635)	-
3767449	41.9349	43.8293	38.4332	102.98	91.8859	70.2239	41.3991	88.3631	-1.09702	0.00017243	0.0121578	52273.TRNA-CYS-1	NC_003070.9	19925839	19925910	-	72	tRNA	tRNA-Cys	-
821629	732.757	616.469	715.232	1426.75	1523.14	1464.22	688.152	1471.37	-1.0967	2.04e-17	5.77e-14	JMJD5	NC_003074.8	7275645	7278420	+	2035	protein_coding	2-oxoglutarate (2OG) and Fe(II)-dependent oxygenase superfamily protein	-
839269	93.8017	91.4698	102.176	242.046	154.584	212.768	95.8158	203.133	-1.08616	3.72e-06	0.000598421	T14P4.21	NC_003070.9	557092	558774	+	1383	protein_coding	Ras-related small GTP-binding family protein	Arf
5008200	76.1449	58.1215	58.1184	186.595	126.478	90.1382	64.1283	134.404	-1.0741	0.000613823	0.0302467	AT5G05365	NC_003076.8	1590036	1590861	+	512	protein_coding	Heavy metal transport/detoxification superfamily protein	HMA
827384	844.215	992.829	800.534	2347.4	1590.17	1594.19	879.193	1843.92	-1.06895	1.51e-08	5.87e-06	HB-2	NC_003075.7	9449114	9450905	+	1333	protein_coding	homeobox protein 2	HALZ
843881	109.251	111.479	137.797	249.087	265.928	223.249	119.509	246.088	-1.04	1.36e-07	3.91e-05	CKX5	NC_003070.9	28314458	28318375	-	2727	protein_coding	cytokinin oxidase 5	FAD_binding_4
3769500	97.1123	115.29	134.985	294.856	215.121	192.854	115.796	234.277	-1.01652	2.09e-05	0.00262538	AT3G42806	NC_003074.8	14914008	14918667	+	4660	pseudogene	hypothetical protein	-
828121	896.082	865.152	928.02	2389.65	1590.17	1384.56	896.418	1788.13	-0.996742	9.81e-07	0.000202418	AT7SL-1	NC_003075.7	1317499	1319179	+	813	protein_coding	7SL RNA1	ubiquitin
823888	8455.39	7863.55	5606.55	15390.6	14943.9	13394.9	7308.5	14576.5	-0.996094	5.13e-09	2.23e-06	ASN1	NC_003074.8	17437840	17441431	-	2746	protein_coding	glutamine-dependent asparagine synthase 1	-
839494	280.302	233.439	285.905	634.6	531.857	426.584	266.548	531.014	-0.995908	2.91e-07	7.38e-05	NET3A	NC_003070.9	865895	867733	-	1372	protein_coding	Kinase interacting (KIP1-like) family protein	-
844768	122.494	91.4698	102.176	277.253	162.152	188.661	105.38	209.355	-0.995671	0.000121973	0.0094034	psaA	NC_000932.1	39605	41857	-	2253	protein_coding	-	-
819357	833.18	819.417	790.223	1682.88	1789.07	1395.05	814.273	1622.33	-0.994706	1.5e-12	1.73e-09	T30B22.26	NC_003071.7	19469571	19472006	+	2352	protein_coding	Tetratricopeptide repeat (TPR)-like superfamily protein	-
822509	39.7278	38.1124	29.9966	66.8927	67.0226	79.657	35.9456	71.1908	-0.988236	0.00114449	0.046734	AT3G28770	NC_003074.8	10796695	10803453	+	6564	protein_coding	transmembrane protein%2C putative (DUF1216)	-
829826	2256.76	2038.06	1894.47	4803.95	4055.95	3402.19	2063.1	4087.36	-0.986746	5.91e-10	4e-07	GBF1	NC_003075.7	17309612	17312488	-	1506	protein_coding	G-box binding factor 1	bZIP_1
818887	823.248	853.718	1002.07	1752.41	1725.29	1792.28	893.013	1756.66	-0.975495	5.29e-14	9.52e-11	PAR1	NC_003071.7	17836416	17837618	-	1203	protein_coding	phy rapidly regulated 1	-
829726	212.985	217.241	202.477	543.943	353.49	340.638	210.901	412.691	-0.970688	8.25e-06	0.00118447	F8D20.240	NC_003075.7	16931003	16933499	+	1767	protein_coding	Regulator of Vps4 activity in the MVB pathway protein	-
826473	7201.76	6775.44	5623.43	10093.8	15978.4	12011.4	6533.54	12694.5	-0.958257	3e-07	7.53e-05	EXO	NC_003075.7	5740219	5741591	+	1373	protein_coding	Phosphate-responsive 1 family protein	-
841497	381.828	306.805	434.013	955.861	725.358	495.76	374.216	725.66	-0.956281	8.6e-05	0.00760777	F4M15.2	NC_003070.9	18810603	18812050	-	1251	protein_coding	aminotransferase-like%2C mobile domain protein	-
835229	1046.16	938.519	1188.62	2390.53	1944.74	1803.81	1057.77	2046.36	-0.952336	3.08e-09	1.57e-06	EXL3	NC_003076.8	20939363	20940895	-	1533	protein_coding	EXORDIUM like 3	-
3766651	112.562	144.827	156.545	353.827	214.04	229.538	137.978	265.802	-0.946301	0.000163107	0.0117385	AT1G03580	NC_003070.9	892885	894194	+	1091	transcribed_pseudogene	pseudogene of MATH domain/coiled-coil protein~AT1G03580.1	MATH
2745725	294.648	222.005	211.851	671.567	393.488	334.35	242.835	466.468	-0.944654	0.000459055	0.0247123	TPD1	NC_003075.7	12837353	12840230	+	1342	protein_coding	tapetum determinant 1	-
820431	153.393	166.742	134.047	314.22	300.521	251.548	151.394	288.763	-0.932942	8.88e-07	0.000189098	SULTR4%3B2	NC_003074.8	3967816	3972135	-	2442	protein_coding	sulfate transporter 4%3B2	Sulfate_transp
824077	392.864	354.446	264.345	591.472	685.36	651.929	337.218	642.921	-0.932083	3.07e-07	7.61e-05	AT3G49160	NC_003074.8	18221794	18224905	-	2665	protein_coding	pyruvate kinase family protein	PK
36335650	252.713	237.25	237.161	693.571	372.948	314.435	242.374	460.318	-0.927402	0.000786586	0.0360755	rrn18	NC_037304.1	126289	128223	-	1935	rRNA	18S ribosomal RNA	-
816084	2434.43	2748.86	2547.84	6431.38	4318.64	3930.44	2577.04	4893.49	-0.9253	1.39e-06	0.000280626	F19G14.12	NC_003071.7	6917514	6920319	-	2709	protein_coding	Leucine-rich repeat (LRR) family protein	-
825264	186.5	181.987	140.609	319.501	348.085	296.617	169.699	321.401	-0.923028	8.05e-07	0.000176716	AT3G60930	NC_003074.8	22514027	22516871	+	2343	pseudogene	hypothetical protein	-
816228	2145.3	1921.82	1732.3	3609.56	4178.1	3161.12	1933.14	3649.6	-0.917006	1.69e-09	9.82e-07	EXL5	NC_003071.7	7494536	7496292	-	1757	protein_coding	EXORDIUM like 5	-
829415	230.642	228.675	225.912	421.6	497.265	375.226	228.409	431.364	-0.916946	7.59e-08	2.35e-05	F4D11.10	NC_003075.7	15811974	15815025	+	2487	protein_coding	Exostosin family protein	-
829416	512.047	425.906	460.26	881.927	985.881	767.222	466.071	878.344	-0.914979	5.18e-09	2.23e-06	T16I18.10	NC_003075.7	15819489	15820879	+	1391	protein_coding	Integrase-type DNA-binding superfamily protein	AP2
824229	666.544	620.28	730.23	1029.8	1368.56	1380.37	672.351	1259.58	-0.904871	2.78e-08	9.49e-06	DWF4	NC_003074.8	18813949	18817405	-	2844	protein_coding	Cytochrome P450 superfamily protein	p450
834301	1650.91	1356.8	1304.85	3030.41	2613.88	2414.86	1437.52	2686.39	-0.902801	2.78e-09	1.49e-06	COR27	NC_003076.8	17197641	17199910	-	1417	protein_coding	cold regulated protein 27	-
844758	216.296	203.902	268.095	606.435	338.356	337.494	229.431	427.428	-0.899009	0.000465473	0.0248583	atpE	NC_000932.1	52265	52663	-	399	protein_coding	-	-
828934	235.056	266.787	246.535	672.447	338.356	382.563	249.459	464.456	-0.898265	0.00047934	0.0253258	ULT1	NC_003075.7	13984695	13987510	+	2325	protein_coding	Developmental regulator%2C ULTRAPETALA	-
834345	377.414	505.943	404.954	1062.36	732.925	600.572	429.437	798.619	-0.895506	7.95e-05	0.00735358	SPL2	NC_003076.8	17360287	17363880	-	2583	protein_coding	squamosa promoter binding protein-like 2	SBP
831749	501.011	429.718	419.952	869.605	906.967	708.528	450.227	828.367	-0.880802	3.56e-08	1.2e-05	HSFA3	NC_003076.8	971142	974326	-	2210	protein_coding	heat shock transcription factor A3	HSF_DNA-bind
835218	175.464	171.506	190.291	249.087	421.594	312.339	179.087	327.673	-0.869206	0.000103327	0.00842475	MFG13.15	NC_003076.8	20891163	20892416	+	1115	protein_coding	HSP20-like chaperones superfamily protein	-
824441	329.961	330.625	449.012	652.204	661.578	713.768	369.866	675.85	-0.868346	3.6e-07	8.59e-05	FTSZ2-2	NC_003074.8	19549604	19553136	-	2595	protein_coding	Tubulin/FtsZ family protein	Tubulin
818696	235.056	203.902	198.728	474.41	352.409	333.302	212.562	386.707	-0.866575	1.09e-05	0.00151561	T20B5.16	NC_003071.7	17095165	17097454	+	1614	protein_coding	Single-stranded nucleic acid binding R3H protein	R3H
5007696	87.1804	68.6024	70.3045	153.149	129.721	126.822	75.3624	136.564	-0.863448	0.00023111	0.0153143	AT1G15175	NC_003070.9	5222729	5224143	-	1335	lncRNA	other RNA	-
821202	881.736	908.982	738.666	1828.99	1383.69	1317.48	843.128	1510.05	-0.841591	9.62e-07	0.000200541	F1C9.14	NC_003074.8	360921	363775	+	1378	protein_coding	Cysteine proteinases superfamily protein	OTU
837543	795.659	1042.38	737.729	1709.28	1589.08	1313.29	858.588	1537.22	-0.840318	2.28e-06	0.000403343	BCAT-2	NC_003070.9	3288087	3290471	+	1752	protein_coding	branched-chain amino acid transaminase 2	-
844309	1731.47	1921.82	1610.44	3524.19	3250.6	2619.25	1754.58	3131.34	-0.83583	4.62e-08	1.5e-05	WRI4	NC_003070.9	29990336	29993766	-	1578	protein_coding	Integrase-type DNA-binding superfamily protein	AP2
836791	222.917	222.958	229.662	440.964	382.678	377.322	225.179	400.321	-0.831199	1.43e-07	4.04e-05	K1F13.27	NC_003076.8	26573964	26574959	+	996	protein_coding	CAP (Cysteine-rich secretory proteins%2C Antigen 5%2C and Pathogenesis-related 1 protein) superfamily protein	SCP
844770	103.734	98.1395	113.425	233.244	145.936	177.132	105.099	185.437	-0.822187	0.000583944	0.0293024	psaB	NC_000932.1	37375	39579	-	2205	protein_coding	-	-
844781	78.352	73.3664	74.9915	158.43	115.668	124.726	75.57	132.941	-0.819185	0.000602621	0.0298574	psbM	NC_000932.1	28707	28811	-	105	protein_coding	-	-
816287	313.408	215.335	278.406	561.546	450.781	399.333	269.05	470.554	-0.809046	8.11e-05	0.00742682	MCA2	NC_003071.7	7724406	7727503	-	2806	protein_coding	PLAC8 family protein	-
838894	632.334	648.864	635.553	1129.25	1183.71	1029.25	638.917	1114.07	-0.802057	1.59e-10	1.21e-07	AtSUN3	NC_003070.9	8098392	8101464	+	2805	protein_coding	Galactose-binding protein	-
824438	303.476	219.146	226.849	341.505	541.586	416.103	249.824	433.065	-0.794045	0.000353368	0.0204579	ACA1	NC_003074.8	19538540	19542286	-	2940	protein_coding	alpha carbonic anhydrase 1	-
832385	2050.39	1969.46	2040.71	3877.13	3534.9	3037.45	2020.19	3483.16	-0.786154	2.53e-09	1.39e-06	SCPL34	NC_003076.8	7810645	7815089	+	2789	protein_coding	serine carboxypeptidase-like 34	Peptidase_S10
3769666	252.713	209.618	164.044	415.439	364.3	295.569	208.792	358.436	-0.783001	0.000323369	0.0192845	AT3G46385	NC_003074.8	17065276	17066583	-	1205	transcribed_pseudogene	pseudogene of Leucine-rich repeat protein kinase family protein~AT3G46385.1	-
823498	201.95	239.156	219.35	391.674	372.948	369.986	220.152	378.203	-0.779737	7.96e-07	0.000176716	AT3G43850	NC_003074.8	15702085	15704391	-	1320	protein_coding	hypothetical protein	-
824657	1485.38	1501.63	1628.25	3489.86	2287.42	2109.86	1538.42	2629.05	-0.773414	8.35e-05	0.0074746	PMR6	NC_003074.8	20344785	20348659	+	2214	protein_coding	Pectin lyase-like superfamily protein	-
836736	828.766	813.7	737.729	1566.7	1406.39	1066.98	793.398	1346.69	-0.763977	7.21e-06	0.00105755	AT5G66052	NC_003076.8	26416126	26416924	+	799	protein_coding	transmembrane protein	-
28720713	502.115	316.333	312.152	645.162	661.578	593.235	376.867	633.325	-0.751062	0.000294952	0.0179852	AT5G05305	NC_003076.8	13987661	13988620	+	960	misc_RNA	novel transcribed region%3B detected in root%2C carpel%2C root apical meristem%2C receptacle%2C leaf%2C dark-grown seedling%2C light-grown seedling%2C flower%2C aerial%2C shoot apical meristem~AT5G05305.1	-
2746216	313.408	229.627	248.409	537.782	425.918	364.745	263.815	442.815	-0.750222	0.000277106	0.0172651	AT5G57565	NC_003076.8	23310284	23311855	+	1479	protein_coding	Protein kinase superfamily protein	Pkinase
839532	122.494	89.5642	102.176	182.195	152.422	191.806	104.745	175.474	-0.748427	0.000715328	0.0338253	T14P4.5	NC_003070.9	575922	580532	+	3030	protein_coding	P-loop containing nucleoside triphosphate hydrolases superfamily protein	Helicase_C
844704	947.949	925.179	848.342	1985.66	1440.99	1118.34	907.157	1514.99	-0.740591	0.000310524	0.0186437	rpl32	NC_000932.1	113449	113607	+	159	protein_coding	-	-
829997	647.783	594.554	571.81	1028.91	1062.63	915.007	604.716	1002.18	-0.729599	6.04e-08	1.9e-05	EXLA2	NC_003075.7	17978422	17979740	-	1126	protein_coding	expansin-like A2	-
838846	355.343	475.453	459.323	651.323	756.707	732.635	430.039	713.555	-0.728453	9.6e-06	0.00136882	UGT85A1	NC_003070.9	7903660	7906969	-	2023	protein_coding	UDP-Glycosyltransferase superfamily protein	UDPGT
830874	206.364	150.544	131.235	249.967	297.278	259.933	162.714	269.059	-0.728384	0.000771166	0.0356156	TPPI	NC_003076.8	3157694	3161708	+	1925	protein_coding	Haloacid dehalogenase-like hydrolase (HAD) superfamily protein	-
833749	427.074	470.689	429.326	888.968	701.576	601.62	442.363	730.721	-0.724978	4.8e-05	0.00519387	K12B20.160	NC_003076.8	14978566	14981620	+	2379	protein_coding	alpha/beta-Hydrolases superfamily protein	Lipase_3
814748	715.1	655.534	654.301	1250.72	1100.47	988.375	674.978	1113.19	-0.722864	4.22e-07	9.96e-05	F5O4.6	NC_003071.7	556433	559046	-	2121	protein_coding	Remorin family protein	-
819108	299.062	299.183	352.46	645.162	469.158	451.739	316.902	522.02	-0.721047	0.000154513	0.011255	EMB2766	NC_003071.7	18564017	18567892	+	2619	protein_coding	structural constituent of nuclear pore	-
828024	1234.87	1330.12	1464.21	2644.02	2024.73	1968.37	1343.07	2212.37	-0.720227	5.68e-06	0.000872615	XTH9	NC_003075.7	1415617	1417444	+	1526	protein_coding	xyloglucan endotransglucosylase/hydrolase 9	-
824962	2889.09	2017.1	2195.38	4850.6	3844.07	2953.6	2367.19	3882.76	-0.714299	0.000576697	0.029074	AT3G57930	NC_003074.8	21446856	21448842	-	1987	protein_coding	rho GTPase-activating gacO-like protein	-
816481	282.509	209.618	248.409	472.65	416.189	321.772	246.845	403.537	-0.711593	0.000487226	0.0256059	NDL3	NC_003071.7	8485991	8488963	-	1862	protein_coding	N-MYC downregulated-like 3	Ndr
823740	4499.17	3251.94	2868.43	6342.48	6364.99	4670.41	3539.85	5792.63	-0.710777	0.000349673	0.0203767	EXLA1	NC_003074.8	16896166	16897308	+	1065	protein_coding	expansin-like A1	-
826849	216.296	200.09	209.976	264.93	436.728	322.82	208.787	341.493	-0.708133	0.000998952	0.0421112	Hop3	NC_003075.7	7338018	7341363	-	2723	protein_coding	stress-inducible protein	TPR_1
827080	199.742	249.636	216.538	367.03	355.652	364.745	221.972	362.476	-0.706147	1.62e-05	0.00214922	XBAT34	NC_003075.7	8271270	8273903	-	1739	protein_coding	hypothetical protein	-
818014	1648.7	1300.59	1526.08	2733.8	2498.21	2064.79	1491.79	2432.27	-0.705756	7.74e-06	0.00112777	T31E10.15	NC_003071.7	14543894	14546986	-	2994	protein_coding	choice-of-anchor C domain protein%2C putative (Protein of unknown function%2C DUF642)	-
3767624	854.147	768.918	668.362	1316.73	1272.35	1117.29	763.809	1235.46	-0.694785	2.78e-06	0.000479115	T12P18.12	NC_003070.9	23701408	23706058	-	3942	protein_coding	Disease resistance protein (TIR-NBS-LRR class) family	NB-ARC
838383	361.964	357.304	343.086	696.212	545.91	472.701	354.118	571.608	-0.692411	0.00012563	0.00964767	T10F20.4	NC_003070.9	6204259	6206988	+	1511	protein_coding	Protein phosphatase 2C family protein	PP2C
827438	1109.07	1024.27	1100.5	2174.01	1538.28	1475.75	1077.95	1729.35	-0.68262	9.27e-05	0.00788013	GATL6	NC_003075.7	944324	947249	-	2926	protein_coding	galacturonosyltransferase 6	Glyco_transf_8
825530	1085.89	1375.86	1419.21	1731.29	2126.35	2371.89	1293.66	2076.51	-0.681931	6.08e-05	0.00613382	AT3G57795	NC_003074.8	21407782	21411904	-	2116	protein_coding	basic helix-loop-helix (bHLH) DNA-binding superfamily protein	-
834834	136.84	146.733	134.985	237.645	225.931	203.335	139.519	222.304	-0.672812	0.000247376	0.0160512	MCA23.17	NC_003076.8	19372821	19374693	-	1127	protein_coding	hypothetical protein	-
838896	765.863	870.869	737.729	1162.7	1488.55	1134.06	791.487	1261.77	-0.672281	2.29e-05	0.00279985	F19G10.22	NC_003070.9	8102728	8103588	+	705	protein_coding	transmembrane protein	-
831219	629.023	660.298	717.106	1222.55	1029.12	944.354	668.809	1065.34	-0.671948	7.86e-06	0.00113683	ZIF1	NC_003076.8	4432297	4437148	+	2453	protein_coding	zinc induced facilitator 1	MFS_1
825210	1060.51	1568.33	1364.85	1795.54	2195.53	2367.7	1331.23	2119.59	-0.670296	0.00021144	0.0143468	HAT3	NC_003074.8	22320580	22322661	-	1447	protein_coding	homeobox-leucine zipper protein 3	Homeobox
814893	1197.35	1201.49	1233.61	2206.58	1842.04	1719.96	1210.82	1922.86	-0.667699	1.28e-06	0.000262032	F19B11.9	NC_003071.7	1104307	1106905	-	2070	protein_coding	Nuclear transport factor 2 (NTF2) family protein with RNA binding (RRM-RBD-RNP motifs) domain-containing protein	RRM_1
818277	251.609	286.796	284.968	490.253	424.837	391.996	274.458	435.695	-0.666896	5.01e-05	0.00528291	TRFL8	NC_003071.7	15549052	15552160	+	2426	protein_coding	TRF-like 8	-
840424	1192.94	1120.51	964.578	1851.87	1729.62	1601.52	1092.67	1727.67	-0.661711	1.55e-06	0.000301762	T9I1.12	NC_003070.9	12980689	12984740	-	3058	protein_coding	EXS (ERD1/XPR1/SYG1) family protein	SPX
824350	332.168	275.362	326.213	587.071	454.024	426.584	311.248	489.226	-0.654521	0.000354164	0.0204579	AT3G51870	NC_003074.8	19243902	19246936	+	1547	protein_coding	Mitochondrial substrate carrier family protein	Mito_carr
838057	795.659	1039.52	955.204	1533.25	1391.26	1457.93	930.127	1460.81	-0.650739	6.03e-06	0.000919274	GAI	NC_003070.9	5148982	5151415	+	2434	protein_coding	GRAS family transcription factor family protein	GRAS
838839	870.7	949.952	995.512	1782.34	1349.1	1278.7	938.722	1470.05	-0.647437	8.25e-05	0.0074746	T16E15.6	NC_003070.9	7886323	7889534	+	1539	protein_coding	RNA-binding (RRM/RBD/RNP motifs) family protein	RRM_1
843774	669.854	545.008	525.878	811.514	911.291	996.76	580.247	906.522	-0.644251	4.86e-05	0.00520353	F1M20.1	NC_003070.9	27943243	27947886	-	3404	protein_coding	Protein kinase superfamily protein	Pkinase
818574	1334.19	1140.51	1093.94	1806.98	1916.63	1834.21	1189.55	1852.61	-0.639675	7.43e-07	0.000167283	T28M21.3	NC_003071.7	16643381	16645866	+	2225	protein_coding	hypothetical protein	-
3768709	366.378	292.513	362.771	609.075	542.667	434.969	340.554	528.904	-0.636635	0.000571876	0.0289046	AT2G20724	NC_003071.7	8932580	8933262	-	683	transcribed_pseudogene	pseudogene of expressed protein~AT2G20724.2	-
843184	331.065	421.142	433.076	609.075	626.986	603.716	395.094	613.259	-0.632487	5.33e-05	0.00555605	CRF10	NC_003070.9	25725455	25727701	-	1915	protein_coding	Integrase-type DNA-binding superfamily protein	AP2
840271	649.991	716.514	703.045	1100.21	1164.25	941.21	689.85	1068.56	-0.630941	6.51e-06	0.000984243	F14M2.9	NC_003070.9	12256474	12260638	+	2759	protein_coding	jacalin lectin family protein	-
823890	169.947	161.025	150.92	269.331	239.984	230.586	160.631	246.634	-0.621288	0.000498206	0.0259762	HSD3	NC_003074.8	17450852	17452949	+	1296	protein_coding	hydroxysteroid dehydrogenase 3	adh_short
837940	1227.15	1273.91	1691.06	2206.58	2002.03	2230.4	1397.37	2146.33	-0.618839	9.5e-05	0.00797476	BXL2	NC_003070.9	564018	567771	+	2773	protein_coding	beta-xylosidase 2	Glyco_hydro_3_C
821505	4176.93	3493.96	3239.63	6085.47	5947.72	4699.76	3636.84	5577.65	-0.617212	9.02e-05	0.00780047	AT3G19680	NC_003074.8	6840281	6842320	+	1856	protein_coding	hypothetical protein (DUF1005)	-
825104	9801.72	7488.14	7006.08	13132.1	13232.6	10896.2	8098.65	12420.3	-0.617068	0.000164626	0.0117752	AT3G59350	NC_003074.8	21932337	21935231	+	2691	protein_coding	Protein kinase superfamily protein	Pkinase_Tyr
837680	506.529	547.866	556.812	966.423	757.788	744.164	537.069	822.792	-0.616041	8.8e-05	0.00770855	T23J18.4	NC_003070.9	3832563	3834462	+	1438	protein_coding	PLAC8 family protein	-
3768382	190.914	162.931	156.545	234.124	290.792	256.789	170.13	260.568	-0.61552	0.00101044	0.042415	T20D16.4	NC_003071.7	9927826	9932319	-	4494	pseudogene	hypothetical protein	rve
834815	669.854	641.242	690.859	1128.37	935.074	998.856	667.318	1020.77	-0.613961	5.29e-06	0.000825176	NF-YB2	NC_003076.8	19309227	19310272	+	1046	protein_coding	nuclear factor Y%2C subunit B2	-
844795	130.219	139.11	139.672	192.757	212.959	221.153	136.334	208.956	-0.613726	0.000876574	0.0380034	psbK	NC_000932.1	7017	7202	+	186	protein_coding	-	-
819956	1339.71	1285.34	1586.07	2115.04	2162.02	2161.22	1403.71	2146.09	-0.612172	2.22e-06	0.000398985	COL9	NC_003074.8	2441565	2444532	+	2057	protein_coding	CONSTANS-like 9	CCT
840399	5530.99	3775.99	3933.3	6185.81	7809.22	6237.35	4413.43	6744.13	-0.611857	0.000750984	0.0351732	PHI-1	NC_003070.9	12851983	12853235	+	1253	protein_coding	Phosphate-responsive 1 family protein	-
843345	3713.44	3197.63	2874.99	5196.5	5429.91	4298.33	3262.02	4974.92	-0.609133	5.97e-05	0.00606965	LGT8	NC_003070.9	26400694	26402815	+	2122	protein_coding	glucosyl transferase family 8	Glyco_transf_8
837667	16810.4	16433.1	13606.3	19927	27297.7	24041.7	15616.6	23755.5	-0.605167	0.000114718	0.00909166	STP1	NC_003070.9	3777236	3780823	+	2483	protein_coding	sugar transporter 1	Sugar_tr
836689	2140.89	2684.07	2364.11	4435.16	3288.43	3208.29	2396.35	3643.96	-0.604769	0.000325673	0.019319	GTE7	NC_003076.8	26225832	26229574	-	3569	protein_coding	global transcription factor group E7	Bromodomain
828117	2240.21	2235.29	2201	3539.15	3333.83	3266.98	2225.5	3379.99	-0.603075	7.22e-09	2.86e-06	F2N1.22	NC_003075.7	550175	553097	+	2315	protein_coding	Protein kinase superfamily protein	Pkinase
817855	263.748	230.58	210.914	342.385	416.189	310.243	235.081	356.272	-0.600731	0.00126599	0.0498409	ZFN2	NC_003071.7	13965714	13968957	-	2288	protein_coding	zinc finger nuclease 2	zf-CCCH
825033	1203.97	1324.41	1137.06	1777.94	1852.85	1919.1	1221.81	1849.96	-0.598269	8.21e-07	0.000176909	AT3G58640	NC_003074.8	21686741	21693928	-	3367	protein_coding	Mitogen activated protein kinase kinase kinase-like protein	Pkinase_Tyr
821523	1338.61	1317.74	1302.04	2339.48	1951.22	1689.57	1319.46	1993.42	-0.595799	7.45e-05	0.00713172	bHLH121	NC_003074.8	6903757	6906207	+	2021	protein_coding	basic helix-loop-helix (bHLH) DNA-binding superfamily protein	HLH
837798	187.603	175.317	214.663	265.81	288.63	317.58	192.528	290.673	-0.592663	0.000880202	0.0380774	ACR8	NC_003070.9	4226239	4229211	-	2153	protein_coding	ACT domain repeat 8	ACT
837829	469.008	459.255	460.26	799.191	616.176	669.747	462.841	695.038	-0.587928	0.000112931	0.00898595	T12C24.26	NC_003070.9	4334499	4337957	+	1949	protein_coding	GPI transamidase subunit PIG-U	-
6240812	616.884	572.639	594.308	1089.65	841.026	743.116	594.61	891.263	-0.585115	0.000706179	0.0336033	AT1G49032	NC_003070.9	18137977	18139131	+	1062	protein_coding	hypothetical protein	-
825197	514.254	519.282	507.13	947.94	695.089	663.459	513.555	768.829	-0.583396	0.000790296	0.0360787	AT3G60260	NC_003074.8	22273799	22277292	+	1770	protein_coding	ELMO/CED-12 family protein	-
823911	770.277	617.421	670.237	1059.72	1032.36	982.087	685.978	1024.72	-0.580125	2.85e-05	0.00342761	AT3G47570	NC_003074.8	17527507	17531041	+	3430	protein_coding	Leucine-rich repeat protein kinase family protein	Pkinase
837464	359.757	298.23	320.589	579.15	445.376	434.969	326.192	486.498	-0.579247	0.00114139	0.046734	NIMIN-3	NC_003070.9	3037754	3038408	-	655	protein_coding	NIM1-interacting 3	-
832358	316.719	300.135	371.208	565.947	457.267	450.691	329.354	491.302	-0.577769	0.000764171	0.0355139	F8H	NC_003076.8	7676662	7679200	+	2340	protein_coding	glucuronoxylan glucuronosyltransferase%2C putative	-
821182	387.346	322.05	349.648	494.654	580.502	498.904	353.015	524.687	-0.572135	0.000240251	0.0157619	TMAC2	NC_003074.8	385237	387051	-	1815	protein_coding	AFP2 (ABI five-binding protein 2) family protein	-
830414	311.201	275.362	282.156	426.881	422.675	440.21	289.573	429.922	-0.571293	9.6e-05	0.00802246	K18I23.12	NC_003076.8	1574862	1576731	-	1504	protein_coding	FAD/NAD(P)-binding oxidoreductase family protein	FAD_binding_3
822281	423.763	375.407	362.771	686.53	541.586	493.664	387.314	573.927	-0.569529	0.00119255	0.0482204	NUDX13	NC_003074.8	9804253	9805781	-	1157	protein_coding	nudix hydrolase homolog 13	NUDIX
844359	231.745	241.061	236.223	350.306	361.057	337.494	236.343	349.619	-0.564497	0.000189602	0.0131349	PSF1	NC_003070.9	30158923	30161829	+	2606	protein_coding	partner of SLD five 1	-
842403	3184.84	3235.75	3019.35	4122.7	4988.86	4820.29	3146.64	4643.95	-0.561371	5.46e-06	0.000845887	F11P17.17	NC_003070.9	22508524	22512333	-	2945	protein_coding	disease resistance protein (TIR class)	-
816091	9545.7	8795.4	7977.22	15025.3	12963.5	10842.8	8772.77	12943.9	-0.561269	0.000257412	0.0164216	F19G14.4	NC_003071.7	6947096	6947866	+	771	protein_coding	stress-induced protein	-
835979	846.422	801.314	675.861	1324.65	1154.52	937.018	774.532	1138.73	-0.557025	0.00121689	0.0486092	PSY1	NC_003076.8	23699708	23700226	-	439	protein_coding	plant peptide containing sulfated tyrosine 1	-
830062	294.648	302.994	263.408	374.951	434.566	454.883	287.016	421.467	-0.553501	0.000586539	0.0293106	BZS1	NC_003075.7	18204631	18206684	-	1422	protein_coding	B-box zinc finger family protein	zf-B_box
821882	845.319	810.842	808.971	1484.84	1057.23	1072.22	821.711	1204.76	-0.553037	0.000974079	0.0412381	AT3G23080	NC_003074.8	8207287	8209329	-	1710	protein_coding	Polyketide cyclase/dehydrase and lipid transport superfamily protein	START
825031	434.798	479.264	417.14	641.642	695.089	616.293	443.734	651.008	-0.552577	7.98e-05	0.00735358	TTL4	NC_003074.8	21680027	21683280	+	2824	protein_coding	tetratricopetide-repeat thioredoxin-like 4	TPR_1
814673	6699.65	6427.66	5448.13	10161.5	8788.61	8288.52	6191.81	9079.55	-0.552417	7.56e-05	0.00720541	MPK17	NC_003071.7	199491	203126	-	2128	protein_coding	MAP kinase 17	Pkinase
824646	5107.23	4224.76	3926.74	6597.73	7172.5	5653.55	4419.58	6474.59	-0.551042	0.000309312	0.0186274	BME3	NC_003074.8	20296130	20298827	+	2107	protein_coding	Plant-specific GATA-type zinc finger transcription factor family protein	GATA
817576	704.064	689.835	639.303	1192.63	930.75	851.072	677.734	991.482	-0.550019	0.000831612	0.0373599	U2B''	NC_003071.7	12905345	12907665	-	1269	protein_coding	U2 small nuclear ribonucleoprotein B	RRM_1
834900	283.612	237.25	232.474	361.749	347.004	391.996	251.112	366.916	-0.549016	0.000873337	0.0379982	sks3	NC_003076.8	19632703	19635679	-	2239	protein_coding	SKU5 similar 3	-
818042	1333.09	1377.76	1232.67	2157.29	1987.98	1618.29	1314.51	1921.19	-0.54786	0.00020611	0.0141303	FAH1	NC_003071.7	14665667	14668250	+	1142	protein_coding	fatty acid hydroxylase 1	-
844382	797.866	827.993	652.426	1231.35	1130.74	965.317	759.428	1109.14	-0.547213	0.000602785	0.0298574	ATXRCC1	NC_003070.9	30235164	30238535	-	2077	protein_coding	BRCT domain-containing DNA repair protein	BRCT
821156	782.416	706.033	620.555	1131.89	1048.58	895.093	703.001	1025.19	-0.545464	0.000484405	0.0255253	F13E7.3	NC_003074.8	680944	681999	+	779	protein_coding	hypothetical protein	-
826505	827.662	759.39	828.656	1273.6	1162.09	1086.9	805.236	1174.2	-0.544875	2.53e-05	0.00305361	GBF2	NC_003075.7	481569	484524	-	1626	protein_coding	G-box binding factor 2	bZIP_1
2745551	308.994	333.484	294.342	423.36	473.482	470.605	312.273	455.816	-0.544671	0.000254092	0.0163452	AT2G20142	NC_003071.7	8695374	8696643	+	1032	protein_coding	Toll-Interleukin-Resistance (TIR) domain family protein	TIR
835980	233.952	282.032	288.717	381.992	406.46	378.371	268.234	388.941	-0.533862	0.000889285	0.0383865	MZN1.11	NC_003076.8	23701392	23704122	+	1574	protein_coding	2-oxoglutarate (2OG) and Fe(II)-dependent oxygenase superfamily protein	2OG-FeII_Oxy
829699	1216.11	1261.52	1353.6	1975.97	1871.23	1682.23	1277.08	1843.14	-0.529329	2.44e-05	0.00296418	PIRL4	NC_003075.7	16846138	16849183	+	2765	protein_coding	plant intracellular ras group-related LRR 4	-
838598	1412.54	1292.96	1379.84	2218.9	1907.98	1766.08	1361.78	1964.32	-0.529104	8.94e-05	0.00777186	ROP2	NC_003070.9	6966842	6969009	+	1375	protein_coding	RHO-related protein from plants 2	Ras
839729	16536.7	16367.4	16557.2	27895.1	20778.1	22685.5	16487.1	23786.2	-0.528839	0.000146354	0.0108603	DYL1	NC_003070.9	9933786	9935440	-	1564	protein_coding	dormancy-associated protein-like 1	-
842144	3045.8	2990.87	2687.51	4360.35	4200.81	4009.05	2908.06	4190.07	-0.527148	3.35e-06	0.000562766	Cand1	NC_003070.9	21362359	21364749	-	2200	protein_coding	plasminogen activator inhibitor	-
828511	742.689	915.651	803.347	1194.39	1183.71	1168.65	820.562	1182.25	-0.526269	7.11e-05	0.00695884	T19F6.100	NC_003075.7	12519907	12520898	-	992	protein_coding	NADP-specific glutamate dehydrogenase	-
820547	1803.2	1846.55	1549.51	2729.4	2477.68	2277.56	1733.09	2494.88	-0.526023	0.000100855	0.00825719	DIN4	NC_003074.8	4382198	4384436	-	1360	protein_coding	Transketolase family protein	-
829793	690.822	723.183	792.098	1163.58	1117.76	895.093	735.368	1058.81	-0.525921	0.000560202	0.0284597	UBC17	NC_003075.7	17201922	17202988	+	631	protein_coding	ubiquitin-conjugating enzyme 17	UQ_con
829227	625.712	521.188	539.002	880.167	804.271	736.827	561.967	807.088	-0.523787	0.000376356	0.0214892	F6I18.90	NC_003075.7	15103120	15105979	+	2212	protein_coding	Calmodulin-binding protein	-
3770388	1571.45	1454.94	1422.03	2467.99	2040.95	1880.32	1482.81	2129.75	-0.522988	0.000284752	0.0176306	AT4G04692	NC_003075.7	2375521	2376462	-	942	transcribed_pseudogene	pseudogene of expressed protein~AT4G04692.2	-
835526	2127.64	1999	1924.47	2530.48	3126.28	3020.68	2017.04	2892.48	-0.519922	7.9e-05	0.00735358	THE1	NC_003076.8	22077040	22080341	-	3302	protein_coding	protein kinase family protein	Pkinase_Tyr
824981	1629.94	1836.07	1826.04	2906.31	2323.09	2337.3	1764.02	2522.23	-0.515989	0.000256273	0.0164216	BZIP61	NC_003074.8	21520974	21523518	-	2045	protein_coding	Basic-leucine zipper (bZIP) transcription factor family protein	bZIP_1
837256	906.014	846.096	918.646	1483.96	1264.78	1064.89	890.252	1271.21	-0.514595	0.00101919	0.0426918	F22G5.39	NC_003070.9	2286185	2287791	-	1360	protein_coding	NAD(P)-binding Rossmann-fold superfamily protein	adh_short
824787	437.006	510.707	462.135	743.741	636.715	627.823	469.949	669.426	-0.510715	0.000568628	0.0288139	AT3G56210	NC_003074.8	20852380	20855610	-	2167	protein_coding	ARM repeat superfamily protein	-
816499	4989.15	5363.37	5534.37	7880.13	7495.72	7236.21	5295.63	7537.35	-0.509214	2.24e-06	0.000398985	MIOX2	NC_003071.7	8530865	8533779	-	1620	protein_coding	myo-inositol oxygenase 2	-
830601	888.357	858.483	724.606	1182.06	1313.43	1009.34	823.815	1168.28	-0.504387	0.00126785	0.0498409	WRKY26	NC_003076.8	2204206	2205965	+	1576	protein_coding	WRKY DNA-binding protein 26	WRKY
819200	526.393	520.235	478.071	741.1	778.327	636.208	508.233	718.545	-0.500095	0.000534405	0.0273596	F4I18.10	NC_003071.7	18898629	18901326	+	2251	protein_coding	U-box domain-containing protein	-

## Sheet: RNA Quality Score
Sample (0.1 g)	Concentration (ng/μl)	OD260/280	OD260/230	RIN
WT-1	752	2.06	2	6
WT-2	406	2.07	1.27	6.7
WT-3	506	2.04	2.36	7.7
OE-1	698	2.04	2.49	7.2
OE-2	296	2.03	1.51	8.2
OE-3	500	2.07	2.27	7.3
